# Supplementary material for: Palladium-catalyzed tandem reaction to construct benzo[c]phenanthridine: application to the total synthesis of benzo[c]phenanthridine alkaloids
Source: Royal Society of Chemistry journal article supplement (doi:10.1039/c0ob01208d), 2011-01-01
Supplement: c0ob01208d.pdf [file c0ob01208d.pdf]

**Electronic supporting information for: *Org. Biomol. Chem.***

**Palladium-Catalyzed Tandem Reaction to Construct Benzo[c]phenanthridine:  
Application to the Total Synthesis of Benzo[c]phenanthridine alkaloids**

Pei Lü, Kanglun Huang, Longguan Xie, and Xiaohua Xu\*

State Key Laboratory of Elemento-organic Chemistry, Nankai University, Tianjin 300071, China

xiaohuaxu@nankai.edu.cn

**CONTENTS**

|                                                            |                 |
|------------------------------------------------------------|-----------------|
| <b>Part 1. Experimental Procedures and Analytical Data</b> | <b>Page S2</b>  |
| <b>Part 2. NMR Spectra of all Compounds</b>                | <b>Page S11</b> |

**General Methods:** All reactions were carried out under an argon atmosphere, and all commercially available reagents were used without further purification. Tetrahydrofuran and toluene were purified by distillation under N<sub>2</sub> from Na/benzophenone immediately prior to use. NMR spectra were recorded with a spectrometer using CDCl<sub>3</sub> or dms-*d*<sub>6</sub>. Chemical shifts (δ) were reported in parts per million (ppm) relative to either a tetramethylsilane internal standard or solvent signals. The melting points were determined and uncorrected. Compounds **9**<sup>1</sup> were synthesized according to literature procedures. The suitably functionalized 2-iodobenzaldehyde **11c**, **11d** were synthesized according to literature<sup>2</sup>, **11a** and **11b** were prepared according to the methods to the literature.<sup>3, 4, 5</sup>

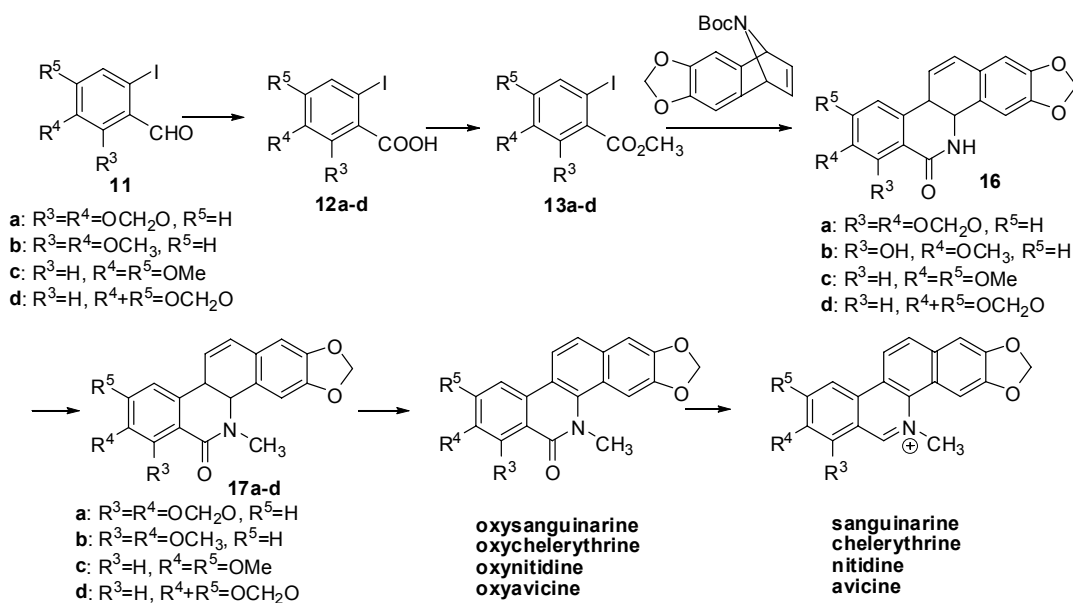

**General Procedure for the substituted benzoic acids 12a-d:** To a stirred solution of 50% aq. KOH (3.5 mL, 48 mmol) and *o*-iodo benzaldehyde (12 mmol) in methanol (20 mL) at 65 °C, aqueous

hydrogen peroxide (30%, 9.6 mL, 96 mmol) was added dropwise during 20 min, The mixture was then stirred at the same temperature for 10 min, cooled, acidified with concentrated hydrochloride and filtrated to give benzoic acid.

**5-iodobenzo[d][1,3]dioxole-4-carboxylic acid 12a:** This compound was obtained in 98% yield; mp: 198-201 °C. IR (KBr):  $\nu = 1692 \text{ cm}^{-1}$  (C=O).  $^1\text{H}$  NMR (400 MHz,  $\text{dms}\text{-}d_6$ )  $\delta$ : 13.61 (s, 1H), 7.35 (d,  $J = 8 \text{ Hz}$ , 1H), 7.81 (d,  $J = 8 \text{ Hz}$ , 1H), 6.12 (s, 2H).  $^{13}\text{C}$  NMR (100 MHz,  $\text{dms}\text{-}d_6$ )  $\delta$ : 165.9, 148.0, 145.8, 132.2, 121.1, 111.5, 102.2, 81.6. HRMS (ESI): calcd for  $[\text{C}_8\text{H}_5\text{IO}_4\text{-H}]^-$ : 290.9160; found: 290.9163.

**6-iodo-2,3-dimethoxybenzoic acid 12b:** This compound was obtained in 97% yield; mp: 128-131 °C (lit.<sup>6</sup> 137-138 °C).  $^1\text{H}$  NMR (400 MHz,  $\text{CDCl}_3$ )  $\delta$ : 7.52 (d,  $J = 8.4 \text{ Hz}$ , 1H), 6.74 (d,  $J = 8.4 \text{ Hz}$ , 1H), 3.92 (s, 3H), 3.88 (s, 3H).  $^{13}\text{C}$  NMR (100 MHz,  $\text{CDCl}_3$ )  $\delta$ : 171.5, 153.0, 146.9, 134.7, 134.1, 115.6, 79.1, 61.9, 56.1. HRMS (ESI): calcd for  $[\text{C}_9\text{H}_9\text{IO}_4\text{-H}]^-$ : 306.9473; found: 306.9480.

**2-iodo-4,5-dimethoxybenzoic acid 12c:** This compound was obtained in 97% yield; mp: 197-200 °C (lit.<sup>7</sup> 159-160 °C).  $^1\text{H}$  NMR (400 MHz,  $\text{dms}\text{-}d_6$ )  $\delta$ : 13.06 (s, 1H), 7.43 (s, 1H), 7.38 (s, 1H), 3.83 (s, 3H), 3.78 (s, 3H);  $^{13}\text{C}$  NMR (100 MHz,  $\text{dms}\text{-}d_6$ )  $\delta$ : 166.9, 151.3, 148.2, 127.1, 123.1, 113.5, 84.7, 55.9, 55.5. HRMS (ESI): calcd for  $[\text{C}_9\text{H}_9\text{IO}_4\text{-H}]^-$ : 306.9473; found: 306.9472.

**6-iodobenzo[d][1,3]dioxole-5-carboxylic acid 12d:** This compound was obtained in 98% yield; mp: 221-223 °C (lit.<sup>8</sup> 216-217 °C).  $^1\text{H}$  NMR (400 MHz,  $\text{dms}\text{-}d_6$ )  $\delta$ : 13.1 (s, 1H), 7.51 (s, 1H), 7.32 (s, 1H), 6.14 (s, 2H).  $^{13}\text{C}$  NMR (100 MHz,  $\text{dms}\text{-}d_6$ ) 167.0, 150.4, 147.7, 129.0, 119.8, 110.1, 102.5, 85.0. HRMS (ESI): cacl. for  $[\text{C}_8\text{H}_5\text{IO}_4\text{-H}]^-$ : 290.9160; found: 290.9156.

**General Procedure for the functionalized methyl *o*-iodobenzoate 13a-d:** To a stirred solution of benzoic acid (0.01 mol) in  $\text{CH}_2\text{Cl}_2$  (50 mL), oxalyl chloride (5.08 g, 0.02 mol) was added, then drops of DMF was added to catalyzed the forming of benzoyl chloride. After all the benzoic acid dissolved, the mixture was stirred 2 h, then the solvent and excess oxalyl chloride removed under reduce pressure and 30 mL of methanol was added to the residue. After the solution was stirred 30 min, 70 mL  $\text{CH}_2\text{Cl}_2$  was added, washed with water and dried over  $\text{MgSO}_4$ , filtered, and concentrated. The residue was purified

by column chromatographic on silica gel with petroleum ether/ethyl acetate in the ratio to afford the methyl *o*-iodobenzoate.

**Methyl 5-iodobenzo[d][1,3]dioxole-4-carboxylate 13a:** 8% ethyl acetate/petroleum ether; white solid (2.99g, 98%); mp: 51-54 °C. IR (KBr):  $\nu = 1708 \text{ cm}^{-1}$  (C=O).  $^1\text{H}$  NMR (400 MHz,  $\text{CDCl}_3$ )  $\delta$ : 7.38 (d,  $J = 8 \text{ Hz}$ , 1H), 6.63 (d,  $J = 8 \text{ Hz}$ , 1H), 6.06 (s, 2H), 3.96 (s, 3H).  $^{13}\text{C}$  NMR (100 MHz,  $\text{CDCl}_3$ )  $\delta$ : 165.0, 148.6, 147.4, 133.3, 119.1, 112.0, 102.3, 81.5, 52.6. HRMS (ESI): cacl. for  $[\text{C}_9\text{H}_7\text{IO}_4 + \text{Na}]^+$ : 328.9281; found: 328.9282.

**methyl 6-iodo-2,3-dimethoxybenzoate 13b:** 10% ethyl acetate/petroleum ether; white solid (3.2g, 97%); mp: 57-60 °C (lit.<sup>6</sup> 57-59 °C).  $^1\text{H}$  NMR (400 MHz,  $\text{CDCl}_3$ )  $\delta$ : 7.46 (d,  $J = 8.8 \text{ Hz}$ , 1H), 6.71 (d,  $J = 8.8 \text{ Hz}$ , 1H), 3.96 (s, 3H), 3.85 (s, 3H), 3.85 (s, 3H).  $^{13}\text{C}$  NMR (100 MHz,  $\text{CDCl}_3$ )  $\delta$ : 167.5, 153.0, 146.8, 135.5, 134.3, 115.2, 79.4, 61.8, 56.0, 52.8. HRMS (ESI): cacl. for  $[\text{C}_{10}\text{H}_{11}\text{IO}_4 + \text{Na}]^+$ : 344.9594; found: 344.9598.

**Methyl 2-iodo-4,5-dimethoxybenzoate 13c:** 10% ethyl acetate/petroleum ether; white solid (3.2 g, 97%); mp: 104-107 °C (lit.<sup>9</sup> 105-107 °C).  $^1\text{H}$  NMR (400 MHz,  $\text{CDCl}_3$ )  $\delta$ : 7.45 (s, 1H), 7.40 (s, 1H), 3.92 (s, 3H), 3.92 (s, 3H), 3.91 (s, 3H).  $^{13}\text{C}$  NMR (100 MHz,  $\text{CDCl}_3$ )  $\delta$ : 165.9, 151.9, 148.6, 126.0, 123.7, 113.8, 84.7, 56.3, 56.0, 52.3. HRMS (ESI): cacl. for  $[\text{C}_{10}\text{H}_{11}\text{IO}_4 + \text{H}]^+$ : 322.9775; found: 322.9775.

**Methyl 6-iodobenzo[d][1,3]dioxole-5-carboxylate 13d:** 8% ethyl acetate/petroleum ether; white solid (2.99 g, 98%); mp: 78-80 °C (lit.<sup>10</sup> 84.6-86.1 °C).  $^1\text{H}$  NMR (400 MHz,  $\text{CDCl}_3$ )  $\delta$ : 7.41 (s, 1H), 7.37 (s, 1H), 6.05 (s, 2H), 3.89 (s, 3H).  $^{13}\text{C}$  NMR (100 MHz,  $\text{CDCl}_3$ )  $\delta$ : 165.9, 151.1, 148.1, 127.5, 120.9, 111.0, 102.4, 84.9, 52.4. HRMS (ESI): cacl. for  $[\text{C}_9\text{H}_7\text{IO}_4 + \text{Na}]^+$ : 328.9281; found: 328.9286.

**General Procedure cyclization of *o*-iodo benzoate with azabicyclic alkene:** To a solution of azabicyclic **9** (1.20 mmol, 0.344 g), Methyl *o*-iodo-benzoate (1.00 mmol) and THF (20 mL) were added  $\text{Pd}(\text{PPh}_3)_2\text{Cl}_2$  (0.02 mmol, 14 mg), zinc powder (10 mmol, 0.654 g), and zinc chloride (0.5 mmol, 68 mg). The mixture was heated at 60 °C under  $\text{N}_2$  atmosphere. After Methyl *o*-iodo-benzoate disappeared

(monitored by TLC), the reaction mixture was cooled, diluted with methylene chloride (15 mL). Then it was filtered through a short pad of Celite silica gel and washed with CH<sub>2</sub>Cl<sub>2</sub> several times. After concentration in vacuo, the crude product was purified by silica gel column using ethyl acetate/petroleum ether as the eluent to give the corresponding *cis*-dihydro benzo[*c*]phenanthridinone.

***cis*-dihydro benzo[*c*]phenanthridinone 10:** 50% ethyl acetate/petroleum ether; off-white solid (262 mg, 90%); mp: decomposed at 260 °C. IR (KBr):  $\nu = 1665 \text{ cm}^{-1}$  (C=O). <sup>1</sup>H NMR (400 MHz, CDCl<sub>3</sub>)  $\delta$ : 8.08 (d,  $J = 7.2$  Hz, 1H), 7.53 (m, 1H), 7.40(m, 1H), 7.31 (d,  $J = 7.2$  Hz, 1H), 6.78 (s, 1H), 6.67 (s, 1H), 6.45 (t,  $J = 2.8$  Hz, 1H), 5.98 (d,  $J = 1.6$  Hz, 2H), 5.69 (t,  $J = 2.4$  Hz, 1H), 5.59 (s, 1H), 4.77 (d,  $J = 5.6$  Hz, 1H), 3.84(dd,  $J = 2.8$  Hz, 2.4 Hz, 1H). <sup>13</sup>C NMR (100 MHz, CDCl<sub>3</sub>)  $\delta$ : 165.1, 148.1, 147.3, 139.7, 133.0, 128.0, 127.7, 127.3, 127.1, 127.0, 126.9, 125.7, 108.4, 107.8, 101.4, 52.5, 38.8.. HRMS (ESI): calcd for [C<sub>18</sub>H<sub>13</sub>NO<sub>3</sub>+Na]<sup>+</sup>: 314.0787; found: 314.0781.

***cis*-dihydro benzo[*c*]phenanthridinone 16a:** 66% ethyl acetate/petroleum ether; off-white solid (305 mg, 91%); mp: decomposed at 260 °C. IR (KBr):  $\nu = 1668 \text{ cm}^{-1}$  (C=O). <sup>1</sup>H NMR (400 MHz, CDCl<sub>3</sub>)  $\delta$ : 6.92 (d,  $J = 7.6$  Hz, 1H), 6.77 (s, 1H), 6.75 (d,  $J = 8$  Hz, 1H), 6.66 (s, 1H), 6.43 (d,  $J = 9.2$  Hz, 1H), 6.13 (d,  $J = 8.4$  Hz, 2H), 5.98 (s, 2H), 5.68 (d,  $J = 8.4$  Hz, 1H), 5.54 (s, 1H), 4.69 (d,  $J = 9.2$  Hz, 1H), 3.75(s, 1H). <sup>13</sup>C NMR (100 MHz, CDCl<sub>3</sub>)  $\delta$ :163.1, 148.3, 148.0, 147.8, 147.2, 133.0, 127.4, 127.3, 127.0, 125.7, 119.6, 111.8, 108.3, 107.7, 102.5, 101.4, 52.8, 38.6. HRMS (ESI): calcd for [C<sub>19</sub>H<sub>13</sub>NO<sub>5</sub>+Na]<sup>+</sup>: 358.0686; found: 358.0689.

***cis*-dihydro benzo[*c*]phenanthridinone 16b:** 70% ethyl acetate/petroleum ether; off-white solid (273 mg, 81%); mp: decomposed at 270 °C. IR (KBr):  $\nu = 1659 \text{ cm}^{-1}$  (C=O). <sup>1</sup>H NMR (400 MHz, CDCl<sub>3</sub>)  $\delta$ : 12.37 (s, 1H), 6.99 (d,  $J = 7.6$  Hz, 1H), 6.76 (s, 1H), 6.70 (s, 1H), 6.67 (s, 1H), 6.68 (d,  $J = 8.4$  Hz, 1H), 6.42 (d,  $J = 8.8$  Hz, 1H), 5.99 (s, 2H), 5.73 (s, 1H), 5.60 (d,  $J = 8.4$  Hz, 1H), 4.73 (s, 1H), 3.89 (s, 3H), 3.76(s, 1H). <sup>13</sup>C NMR (100 MHz, CDCl<sub>3</sub>)  $\delta$ : 169.6, 151.9, 148.3, 147.6, 147.3, 131.3, 127.7, 127.4, 126.7, 124.8, 116.5, 116.3, 110.1, 108.5, 107.8, 101.5, 56.2, 53.0, 38.3. HRMS (ESI): calcd for [C<sub>19</sub>H<sub>15</sub>NO<sub>5</sub>+Na]<sup>+</sup>: 360.0842; found: 360.0847.

***cis*-dihydro benzo[c]phenanthridinone 16c:** 66% ethyl acetate/petroleum ether; off-white solid (316 mg, 90%); mp: decomposed at 270 °C. IR (KBr):  $\nu = 1662 \text{ cm}^{-1}$  (C=O).  $^1\text{H}$  NMR (400 MHz,  $\text{CDCl}_3$ )  $\delta$ : 7.58 (s, 1H), 6.79 (s, 1H), 6.76 (s, 1H), 6.68 (s, 1H), 6.46 (d,  $J = 8 \text{ Hz}$ , 1H), 5.99 (s, 2H), 5.69 (d,  $J = 8.0 \text{ Hz}$ , 1H), 5.56 (s, 1H), 4.76 (s, 1H), 3.96 (s, 3H), 3.95 (s, 3H), 3.77 (s, 1H).  $^{13}\text{C}$  NMR (100 MHz,  $\text{CDCl}_3$ )  $\delta$ : 165.3, 153.0, 148.4, 148.0, 147.3, 133.3, 127.3, 127.0, 126.7, 125.9, 120.5, 110.0, 109.2, 108.4, 107.7, 101.4, 56.2, 52.7, 38.4. HRMS (ESI): calcd for  $[\text{C}_{20}\text{H}_{17}\text{NO}_5 + \text{Na}]^+$ : 374.0999; found: 374.0996.

***cis*-dihydro benzo[c]phenanthridinone 16d:** 66% ethyl acetate/petroleum ether; off-white solid (295 mg, 88%); mp: decomposed at 270 °C. IR (KBr):  $\nu = 1663 \text{ cm}^{-1}$  (C=O).  $^1\text{H}$  NMR (400 MHz,  $\text{CDCl}_3$ )  $\delta$ : 7.52 (s, 1H), 6.75 (s, 1H), 6.67 (s, 1H), 6.46 (s, 1H), 6.46 (d,  $J = 9.2 \text{ Hz}$ , 1H), 6.03 (d,  $J = 5.6 \text{ Hz}$ , 2H), 5.99 (s, 2H), 5.68 (d,  $J = 9.2 \text{ Hz}$ , 1H), 5.65 (s, 1H), 4.73 (s, 1H), 3.75 (s, 1H).  $^{13}\text{C}$  NMR (100 MHz,  $\text{CDCl}_3$ )  $\delta$ : 164.8, 151.5, 148.0, 147.3, 147.3, 135.2, 127.3, 127.1, 126.5, 125.9, 122.1, 108.4, 107.8, 107.7, 106.9, 101.7, 101.4, 52.5, 38.7. HRMS (ESI): calcd for  $[\text{C}_{19}\text{H}_{13}\text{NO}_5 + \text{Na}]^+$ : 358.0686; found: 358.0688.

**General Procedure for *N*-methyl *cis*-dihydro benzo[c]phenanthridinone:** A mixture of *cis*-dihydro benzo[c]phenanthridinone **16a-d** (0.6 mmol), KOH (1.8 mmol, 100 mg),  $\text{CH}_3\text{I}$  (1.2 mmol, 170 mmg) and  $\text{CH}_3\text{COCH}_3$  (15 mL) was stirred and warmed to reflux for about 2 h with TLC monitoring. Then 70 mL  $\text{CHCl}_3$  was added, washed with water and brine, and dried over  $\text{MgSO}_4$ , filtered, and concentrated. The residue was purified by column chromatographic on silica gel with petroleum ether/ethyl acetate to afford the *N*-methyl *cis*-dihydro benzo[c]phenanthridinone.

***N*-methyl *cis*-dihydro benzo[c]phenanthridinone 17a:** 50% ethyl acetate/petroleum ether; off-white solid (209 mg, 100%); mp: decomposed at 270 °C. IR (KBr):  $\nu = 1651 \text{ cm}^{-1}$  (C=O).  $^1\text{H}$  NMR (400 MHz,  $\text{dms-}d_6$ )  $\delta$ : 8.29 (s, 1H), 7.70 (s, 1H), 7.69 (d,  $J = 8 \text{ Hz}$ , 1H), 7.31 (s, 1H), 7.29 (s, 1H), 7.28 (s, 1H), 7.03 (d,  $J = 8 \text{ Hz}$ , 1H), 6.94 (d,  $J = 8 \text{ Hz}$ , 1H), 6.13 (s, 2H), 6.10 (s, 2H), 2.57 (s, 3H).  $^{13}\text{C}$  NMR (100 MHz,  $\text{dms-}d_6$ )  $\delta$ : 164.9, 147.5, 147.3, 146.4, 144.8, 135.8, 133.0, 130.0, 128.9, 126.5, 125.9, 124.8, 123.0, 119.5, 108.6, 103.6, 103.2, 101.5, 101.2, 25.8. HRMS (ESI): calcd for  $[\text{C}_{20}\text{H}_{15}\text{NO}_5 + \text{Na}]^+$ : 372.0842; found: 372.0841.

***N*-methyl *cis*-dihydro benzo[*c*]phenanthridinone 17b:** 50% ethyl acetate/petroleum ether; off-white solid (219 mg, 100%); mp: decomposed at 280 °C. IR (KBr):  $\nu = 1651 \text{ cm}^{-1}$  (C=O).  $^1\text{H}$  NMR (400 MHz,  $\text{CDCl}_3$ )  $\delta$ : 6.82 (s, 2H), 6.65 (s, 1H), 6.50 (s, 2H), 6.35 (d,  $J = 7.2$  Hz, 1H), 5.86 (d,  $J = 12.8$  Hz, 1H), 4.66 (d,  $J = 7.2$  Hz, 1H), 3.95 (s, 3H), 3.78 (s, 3H), 3.76 (d,  $J = 12.8$  Hz, 1H), 3.40 (s, 3H).  $^{13}\text{C}$  NMR (100 MHz,  $\text{CDCl}_3$ )  $\delta$ : 162.7, 152.8, 149.1, 147.6, 146.7, 131.2, 128.9, 126.9, 125.8, 124.2, 120.6, 114.7, 111.0, 107.3, 105.8, 101.1, 61.6, 61.3, 55.9, 36.1, 35.6. HRMS (ESI): calcd for  $[\text{C}_{21}\text{H}_{19}\text{NO}_5 + \text{Na}]^+$ : 388.1155; found: 388.1150.

***N*-methyl *cis*-dihydro benzo[*c*]phenanthridinone 17c:** 50% ethyl acetate/petroleum ether; off-white solid (219 mg, 100%); mp: decomposed at 280 °C. IR (KBr):  $\nu = 1663 \text{ cm}^{-1}$  (C=O).  $^1\text{H}$  NMR (400 MHz,  $\text{CDCl}_3$ )  $\delta$ : 7.50 (s, 1H), 6.71 (s, 1H), 6.67 (s, 1H), 6.59 (s, 1H), 6.38 (d,  $J = 9.6$  Hz, 1H), 5.91 (s, 2H), 5.61 (d,  $J = 9.6$  Hz, 1H), 5.47 (s, 1H), 4.68 (s, 1H), 3.88 (s, 3H), 3.87 (s, 3H), 3.69 (s, 1H), 1.18 (s, 3H).  $^{13}\text{C}$  NMR (100 MHz,  $\text{CDCl}_3$ )  $\delta$ : 165.3, 153.0, 148.5, 148.1, 147.3, 133.3, 127.3, 127.0, 126.7, 125.8, 120.4, 110.0, 109.2, 108.4, 107.7, 101.4, 56.2, 52.7, 38.4, 29.7. HRMS (ESI): calcd for  $[\text{C}_{21}\text{H}_{19}\text{NO}_5 + \text{Na}]^+$ : 388.1155; found: 388.1153.

***N*-methyl *cis*-dihydro benzo[*c*]phenanthridinone 17d:** 50% ethyl acetate/petroleum ether; off-white solid (209mg, 100%); mp: decomposed at 280 °C. IR (KBr):  $\nu = 1647 \text{ cm}^{-1}$  (C=O).  $^1\text{H}$  NMR (400 MHz,  $\text{CDCl}_3$ )  $\delta$ : 7.45 (s, 1H), 6.60 (br s, 2H), 6.54 (br s, 2H), 6.31 (s, 1H), 5.94 (s, 2H), 5.89 (s, 2H), 4.68 (s, 1H), 3.78 (s, 1H), 3.40 (s, 3H).  $^{13}\text{C}$  NMR (100 MHz,  $\text{CDCl}_3$ )  $\delta$ : 163.9, 150.5, 147.6, 146.8, 133.4, 129.2, 127.1, 125.1, 125.1, 124.2, 107.8, 107.4, 105.8, 105.8, 105.6, 101.4, 61.1, 35.5, 29.7. HRMS (ESI): calcd for  $[\text{C}_{20}\text{H}_{15}\text{NO}_5 + \text{Na}]^+$ : 372.0842; found: 372.0846.

**General Procedure for oxybenzo[*c*]phenanridines:** To a suspension of *N*-methyl *cis*-dihydro benzo[*c*]phenanthridinone **17a-d** (0.3 mmol) and DDQ (136 mg, 0.6 mmol) in benzene (10 mL) was refluxed for about 2 h with TLC monitoring. After the dihydro compound disappeared,  $\text{CHCl}_3$  (80 mL) was added, the mixture was successively washed with  $\text{H}_2\text{O}$  (15 mL), 1 N NaOH (10 mL $\times$ 3),  $\text{H}_2\text{O}$  (15 mL), and brine (15 mL), dried ( $\text{Na}_2\text{SO}_4$ ), and evaporated. The residue was purified by column

chromatography on silica gel with ethyl acetate/ petroleum ether as the eluent to give the oxybenzo[c]phenanridines.

**Oxysanguinarine:** 50% ethyl acetate/petroleum ether; off-white solid (98 mg, 94%); mp: 361-363 °C (lit.<sup>11</sup> 366-368 °C). IR (KBr):  $\nu = 1649 \text{ cm}^{-1}$  (C=O). <sup>1</sup>H NMR: (400 MHz, CDCl<sub>3</sub>)  $\delta$ : 7.98 (d,  $J = 8.8$  Hz, 1H), 7.76 (d,  $J = 8.4$  Hz, 1H), 7.59 (s, 1H),  $\delta = 7.54$  (d,  $J = 8.4$  Hz, 1H), 7.25 (d,  $J = 8.4$  Hz, 1H), 7.17 (s, 1H), 6.28 (s, 2H), 6.10 (s, 2H), 3.91 (s, 3H). HRMS (ESI): calcd for [C<sub>20</sub>H<sub>13</sub>NO<sub>5</sub>+Na]<sup>+</sup>: 370.0686; found: 370.0682.

**Oxychelerythrine:** 50% ethyl acetate/petroleum ether; off-white solid (101 mg, 93%); mp: 198-200 °C (lit.<sup>12</sup> 199-201 °C). IR (KBr):  $\nu = 1646 \text{ cm}^{-1}$  (C=O). <sup>1</sup>H NMR: (400 MHz, CDCl<sub>3</sub>)  $\delta$ : 7.99 (s, 1H), 7.97 (s, 1H), 7.53 (s, 1H), 7.52 (d,  $J = 9.2$  Hz, 1H), 7.38 (d,  $J = 9.2$  Hz, 1H), 7.15 (s, 1H), 6.09 (s, 2H), 4.08 (s, 3H), 3.98 (s, 3H), 3.89 (s, 3H). <sup>13</sup>C NMR (100 MHz, CDCl<sub>3</sub>)  $\delta$ : 162.6, 152.6, 150.0, 147.5, 147.0, 135.6, 131.6, 128.8, 123.3, 120.9, 119.7, 118.4, 117.8, 117.7, 104.6, 102.5, 101.5, 61.8, 56.5, 40.8. HRMS (ESI): calcd for [C<sub>21</sub>H<sub>17</sub>NO<sub>5</sub>+Na]<sup>+</sup>: 386.0999; found: 386.0996.

**Oxynitidine:** 50% ethyl acetate/petroleum ether; off-white solid (103 mg, 95%); mp: 270-272 °C (lit.<sup>13</sup> 276-278 °C). IR (KBr):  $\nu = 1626 \text{ cm}^{-1}$  (C=O). <sup>1</sup>H NMR: (400 MHz, CDCl<sub>3</sub>)  $\delta$ : 7.97 (d,  $J = 8.8$  Hz, 1H), 7.92 (s, 1H), 7.62 (s, 1H), 7.57 (s, 1H), 7.54 (d,  $J = 8.8$  Hz, 12H), 7.17 (s, 1H), 6.10 (s, 2H), 4.10 (s, 3H), 4.06 (s, 3H), 3.97 (s, 3H). <sup>13</sup>C NMR (100 MHz, CDCl<sub>3</sub>)  $\delta$ : 164.3, 153.5, 149.7, 147.5, 147.0, 135.9, 131.8, 128.9, 123.2, 121.0, 119.1, 118.3, 116.6, 108.6, 104.8, 102.8, 102.6, 101.5, 56.3, 56.1, 41.2. HRMS (ESI): calcd for [C<sub>21</sub>H<sub>17</sub>NO<sub>5</sub>+Na]<sup>+</sup>: 386.0999; found: 386.0995.

**Oxyavicine:** 50% ethyl acetate/petroleum ether; off-white solid (97 mg, 93%); mp: 271-273 °C (lit.<sup>14</sup> 276-277 °C). IR (KBr):  $\nu = 1646 \text{ cm}^{-1}$  (C=O). <sup>1</sup>H NMR: (400 MHz, CDCl<sub>3</sub>)  $\delta$ : 7.92 (d,  $J = 8.4$  Hz, 1H), 7.91 (s, 1H), 7.63 (s, 1H), 7.61 (s, 1H), 7.55 (d,  $J = 8.4$  Hz, 1H), 7.18 (s, 1H), 6.15 (s, 2H), 6.12 (s, 2H), 3.98 (s, 3H). <sup>13</sup>C NMR (100 MHz, CDCl<sub>3</sub>)  $\delta$ : 164.1, 152.4, 148.2, 147.6, 147.0, 135.8, 131.0, 123.3, 120.9, 120.7, 118.5, 116.8, 106.6, 104.8, 102.7, 102.0, 101.6, 100.7, 41.2. HRMS (ESI): m/z(%) calcd for [C<sub>20</sub>H<sub>13</sub>NO<sub>5</sub>+Na]<sup>+</sup>: 370.06866; found: 370.0693.



**General Procedure for benzo[c]phenanthridinium chloride:** LiAlH<sub>4</sub> (13.6 mg, 0.6 mmol) was added to a solution of oxybenzo[c]phenanthridine (0.2 mmol) in anhyd THF (5 mL) and the mixture was stirred for 20 min at r.t., Excess hydride was decomposed with wet Et<sub>2</sub>O, and the organic layer was concentrated. The residue was treated with 10% HCl (5 mL) at r.t., the resulting precipitates were collected by filtration to produce desired quaternary base salt.

**Sanguinarine Chloride:** orange-red solid (72 mg, 98%); mp: 287-289 °C (lit.<sup>15</sup> 285-287 °C). IR (KBr):  $\nu = 1684 \text{ cm}^{-1}$  (C=N<sup>+</sup>). <sup>1</sup>H NMR (dms<sub>o</sub>-d<sub>6</sub>, 400 MHz)  $\delta$ : 10.14 (s, 1H), 8.75 (d, *J* = 8.8 Hz, 1H), 8.62 (d, *J* = 8.4 Hz, 1H), 8.28 (d, *J* = 9.6 Hz, 1H), 8.11 (d, *J* = 8.8 Hz, 1H), 7.76 (s, 1H), 6.61 (s, 2H), 6.35 (s, 2H), 4.93 (s, 3H). <sup>13</sup>C NMR (dms<sub>o</sub>-d<sub>6</sub>, 100 MHz)  $\delta$ : 155.8, 149.9, 148.7, 147.5, 146.2, 132.1, 131.4, 131.3, 127.1, 125.6, 120.2, 119.9, 118.8, 117.3, 109.4, 105.7, 104.9, 104.2, 102.7, 52.1. HRMS (ESI): calcd for [C<sub>20</sub>H<sub>14</sub>NO<sub>4</sub>]<sup>+</sup>: 332.0917; found: 332.0911.

**Chelerythrine Chloride:** yellow solid (74 mg, 97%), mp: 202-204 °C (lit.<sup>15</sup> 192-193 °C). IR (KBr):  $\nu = 1678 \text{ cm}^{-1}$  (C=N<sup>+</sup>). <sup>1</sup>H NMR (dms<sub>o</sub>-d<sub>6</sub>, 400 MHz)  $\delta$ : 10.11 (s, 1H), 8.84 (d, *J* = 8.4 Hz, 2H), 8.30 (br s, 3H), 7.79 (s, 1H), 6.36 (s, 2H), 5.00 (s, 3H), 4.18 (s, 3H), 4.12 (s, 3H). <sup>13</sup>C NMR (dms<sub>o</sub>-d<sub>6</sub>, 100 MHz)  $\delta$ : 150.9, 150.6, 148.8, 148.7, 145.4, 132.3, 131.7, 131.1, 128.0, 126.1, 125.3, 120.1, 119.4, 119.2, 118.7, 105.8, 104.3, 102.7, 62.2, 57.0, 52.2. HRMS (ESI): calcd for [C<sub>21</sub>H<sub>18</sub>NO<sub>4</sub>]<sup>+</sup>: 348.1230; found: 348.1235.

**Nitidine Chloride:** yellow solid (74 mg, 97%); mp: 280-282 °C (lit.<sup>15</sup> 286-292 °C). IR (KBr):  $\nu = 1684 \text{ cm}^{-1}$  (C=N<sup>+</sup>). <sup>1</sup>H NMR (dms<sub>o</sub>-d<sub>6</sub>, 400 MHz)  $\delta$ : 9.88 (s, 1H), 8.92 (d, *J* = 8.8 Hz, 1H), 8.38 (s, 1H), 8.32 (s, 1H), 8.30 (d, *J* = 8.8 Hz), 7.91 (s, 1H), 7.79 (s, 1H), 6.35 (s, 2H), 4.90 (s, 3H), 4.24 (s, 3H), 4.04 (s, 3H). <sup>13</sup>C NMR (dms<sub>o</sub>-d<sub>6</sub>, 100 MHz)  $\delta$ : 158.3, 151.5, 151.3, 148.9, 148.4, 132.6, 132.5, 130.0, 124.1, 119.9, 119.4, 119.3, 108.7, 105.7, 104.6, 103.3, 102.7, 57.3, 56.3, 51.4. HRMS (ESI): calcd for [C<sub>21</sub>H<sub>18</sub>NO<sub>4</sub>]<sup>+</sup>: 348.1230; found: 348.1234.

**Avicine Chloride:** yellow solid (74 mg, 97%); mp: 338-342 °C. IR (KBr):  $\nu = 1684 \text{ cm}^{-1}$  (C=N<sup>+</sup>). <sup>1</sup>H NMR (dms<sub>o</sub>-d<sub>6</sub>, 400 MHz)  $\delta$ : 9.89 (s, 1H), 8.73 (d, *J* = 8.4 Hz, 1H), 8.59 (s, 1H), 8.31 (s, 1H), 8.24 (d, *J* = 8.4 Hz, 1H), 7.86 (s, 1H), 7.76 (s, 1H), 6.49 (s, 2H), 6.36 (s, 2H), 4.89 (s, 3H). <sup>13</sup>C NMR (100 MHz,

CDCl<sub>3</sub>) δ: 157.2, 151.4, 150.2, 149.0, 148.5, 134.6, 132.8, 132.6, 130.2, 124.6, 120.8, 119.8, 119.1, 105.7, 105.7, 104.6, 104.2, 102.8, 100.9, 51.4. HRMS (ESI): calcd for [C<sub>20</sub>H<sub>14</sub>NO<sub>4</sub>]<sup>+</sup>: 332.0917; found: 332.0920.

## References

- [1] McManus, H. A.; Fleming, M. J.; Lautens, M. *Angew. Chem. Int. Ed.* **2007**, *46*, 433-436.
- [2] Hathaway, B. A.; White, K. L.; McGill, M. E. *Synthetic Communications.* **2007**, *37*, 3855-3860
- [3] Crobie, L.; Horsham, M. K. *Tetrahedron Letters.* **1987**, *28*, 4879-4882
- [4] Mattson, R. J.; Sloan, C. P.; Lockhart, C. C.; Catt, J. D.; Gao, Q.; Huang, S. *J. Org. Chem.* **1999**, *64*, 8004-8007.
- [5] Boguchi, D. E.; Charlton, J. L. *J. Org. Chem.* **1995**, *60*, 588-593.
- [6] Dyke, S. F.; Tiley, E. P. *Tetrahedron* **1975**, *31*, 561-568.
- [7] Piatak, D. M.; Yim, F. K.; Roosenberg, J. *J. Org. Chem.* **1977**, *42*, 1068-1070.
- [8] Padwa, A. Brodney, M. A.; Lynch, S. M. *J. Org. Chem.* **2001**, *66*, 1716-1724.
- [9] Pampin, M. C.; Estévez, J. C.; Estévez, R. J.; Maestro, M.; Castedo, L. *Tetrahedron* **2003**, *59*, 7231-7243.
- [10] Matveenko, M.; Kokas, O. J.; Banwell, M. G.; Willis, A. C. *Org. Lett.* **2007**, *9*, 3683-3685.
- [11] Pandey, V. B.; Ray, A. B.; Dasgupta, B. *Phytochemistry* **1979**, *18*, 695-696.
- [12] Scheuer, P. J.; Chang, M. Y.; Swanholm, C. E. *J. Org. Chem.* **1962**, *27*, 1472-1473.
- [13] Moura, N. F.; H. B. Ribeiro, H. B.; Machado, E. C. S.; Ethur, E. M.; Zanatta, N.; Morel, A. F. *Phytochemistry* **1997**, *46*, 1443-1446.
- [14] Gopinath, K. W.; Govindachari, T. R.; Viswanathan, N. *Tetrahedron* **1961**, *14*, 322-325.
- [15] Ishii, H.; Ishikawa, T.; Ichikawa, Y.-I.; Sakamoto, M.; Ishikawa, M.; Takashi, T. *Chem. Pharm. Bull.* **1984**, *32*, 2984-2994.

## Part 2. NMR Spectra of All Compounds

### 12a

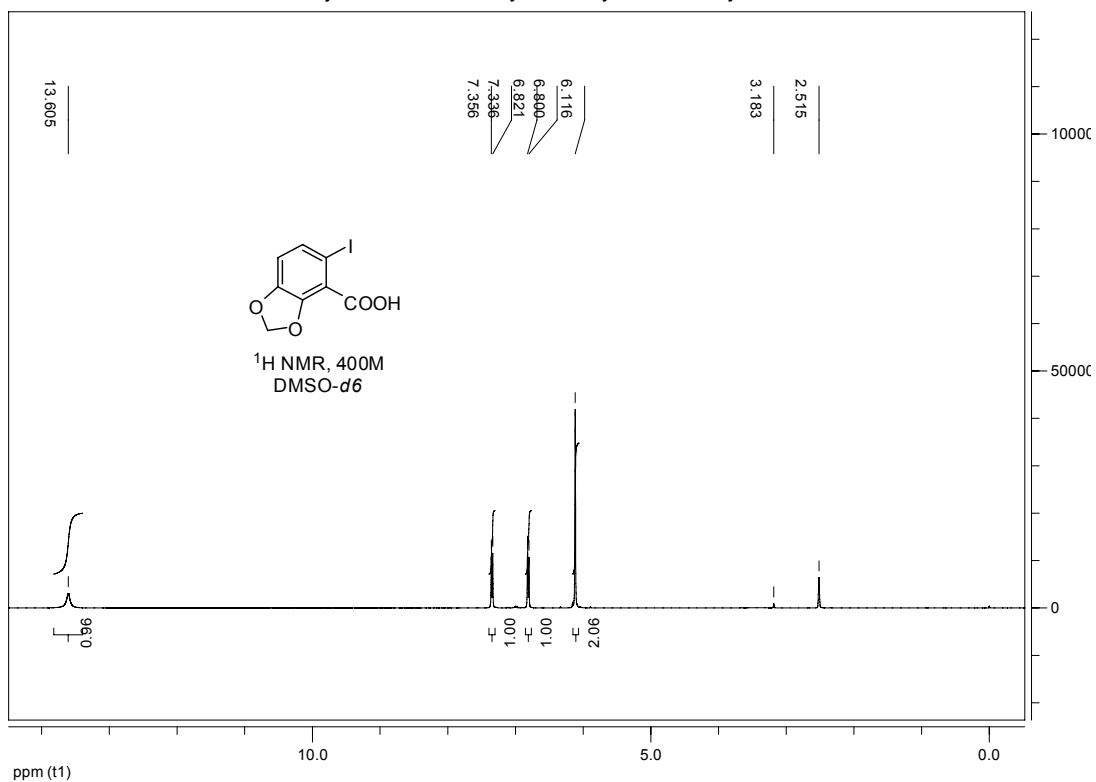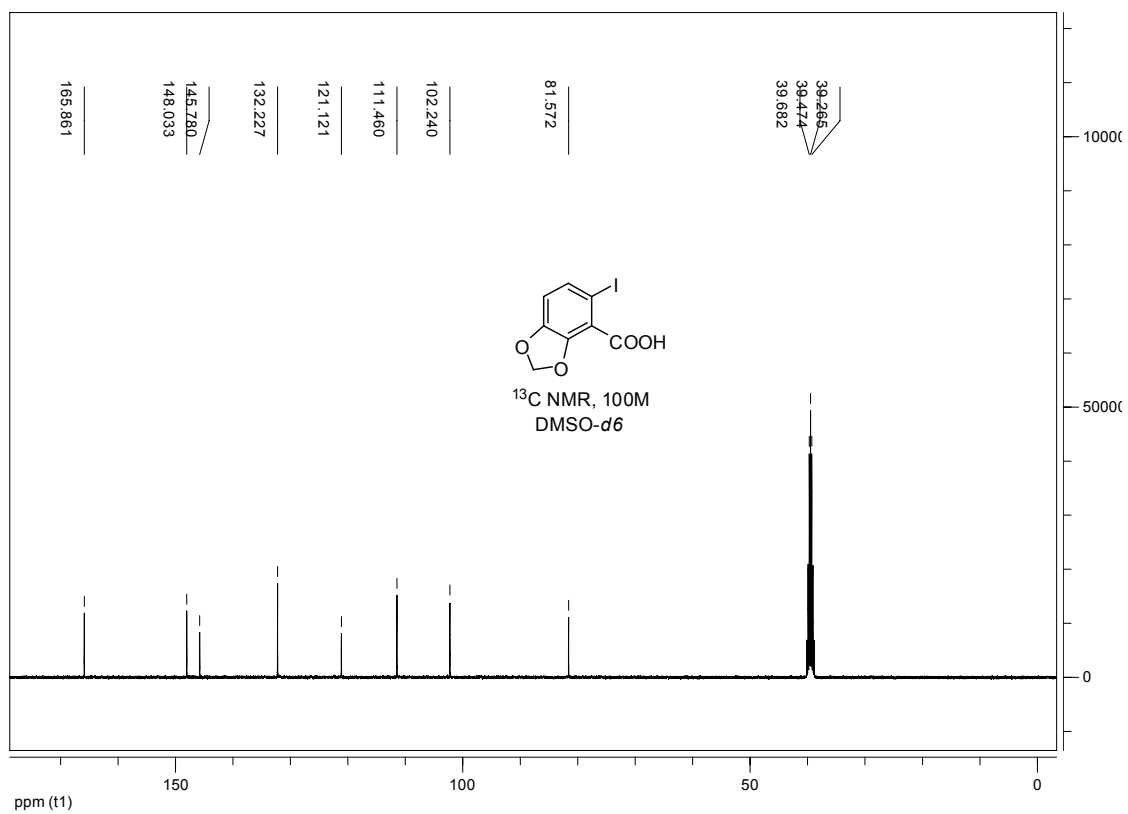

12b

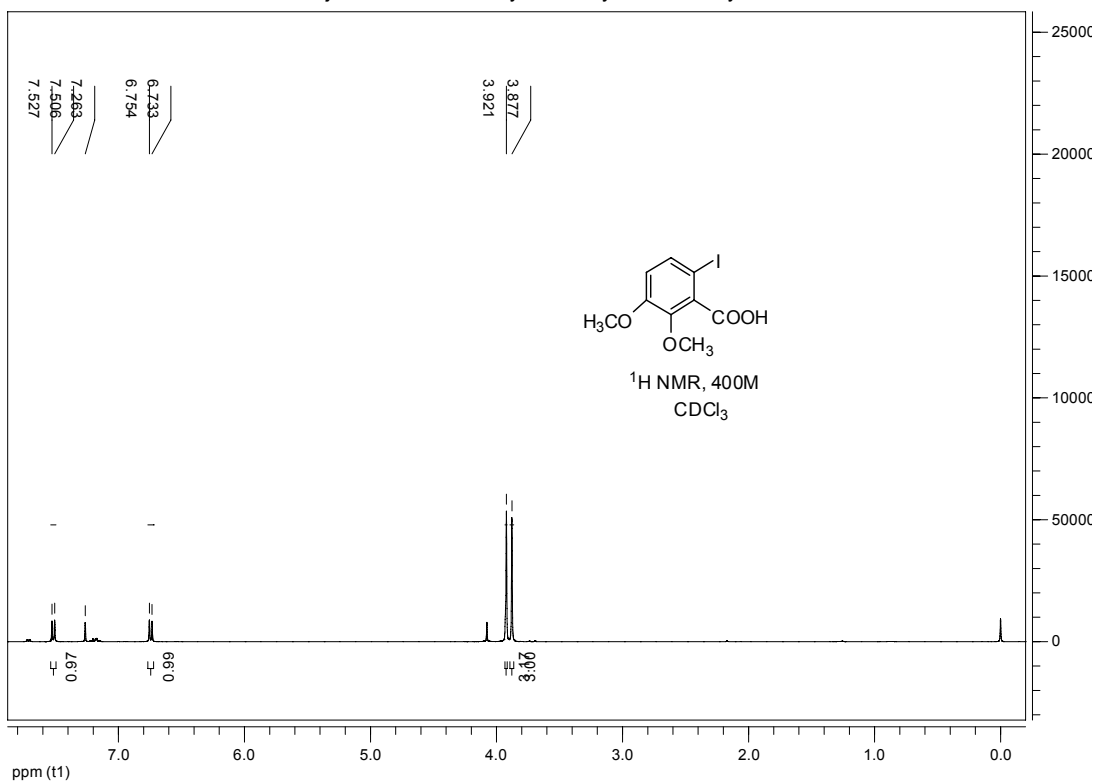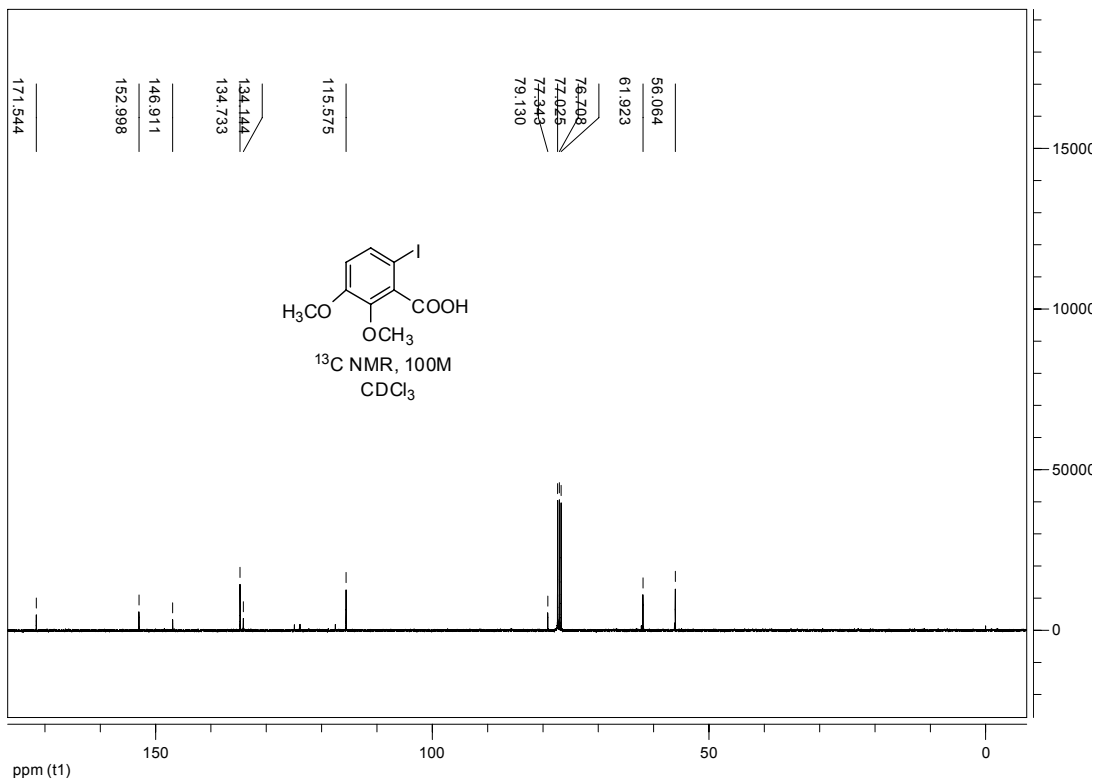

12c

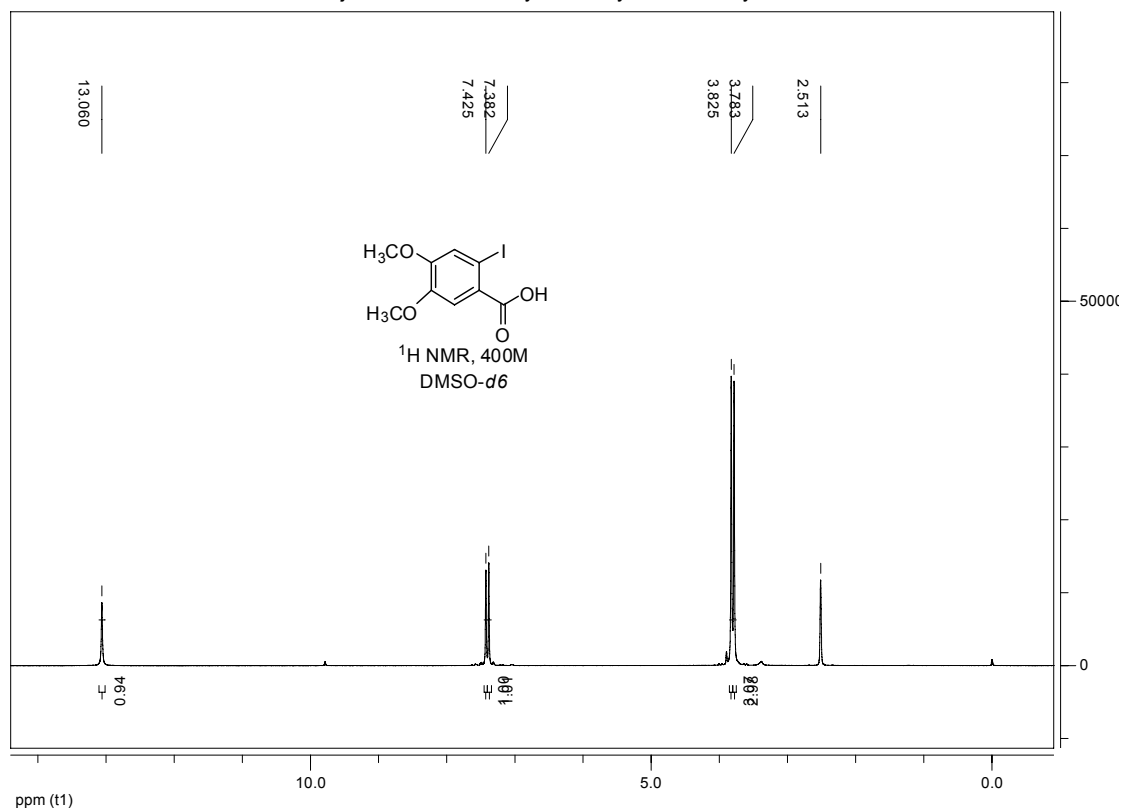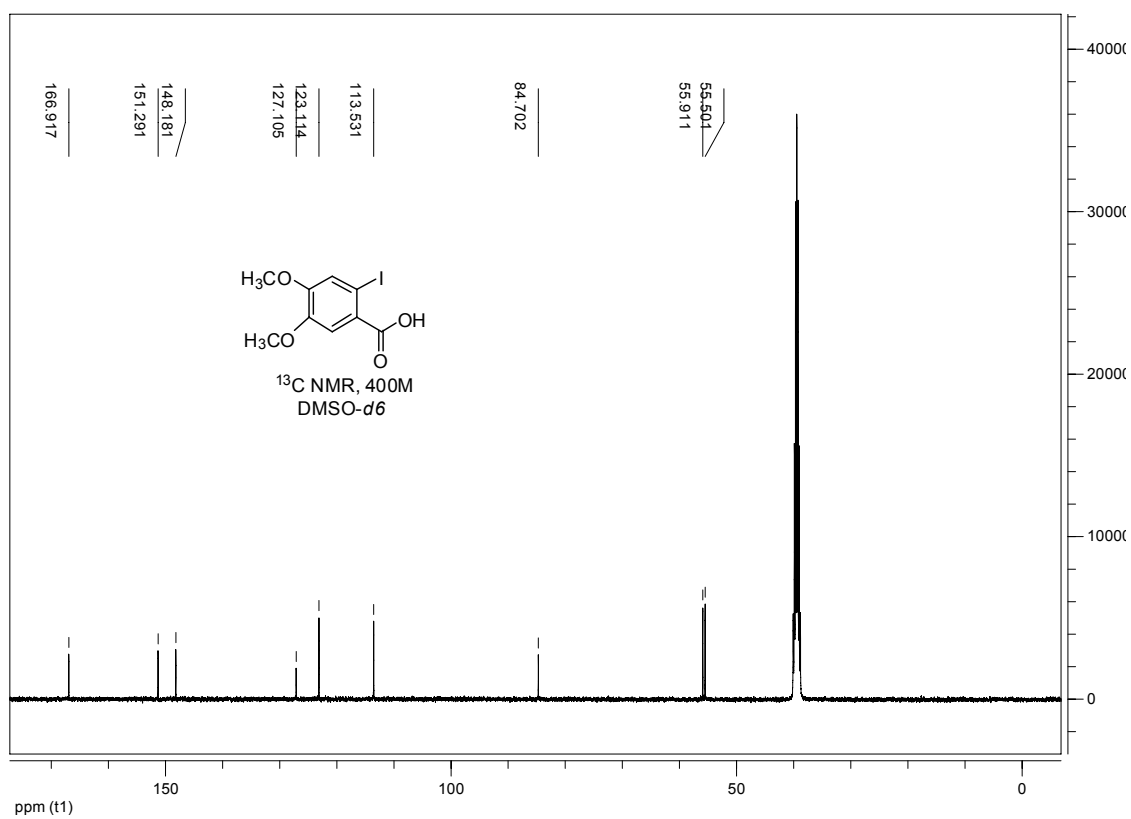

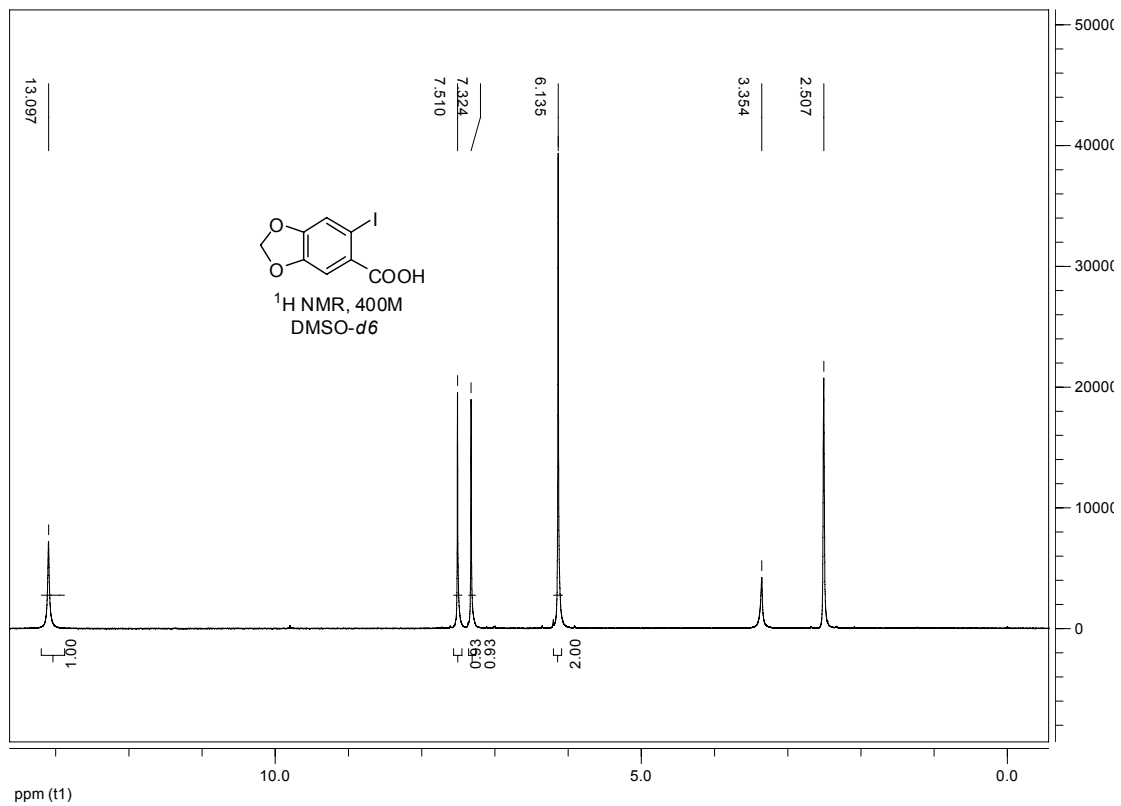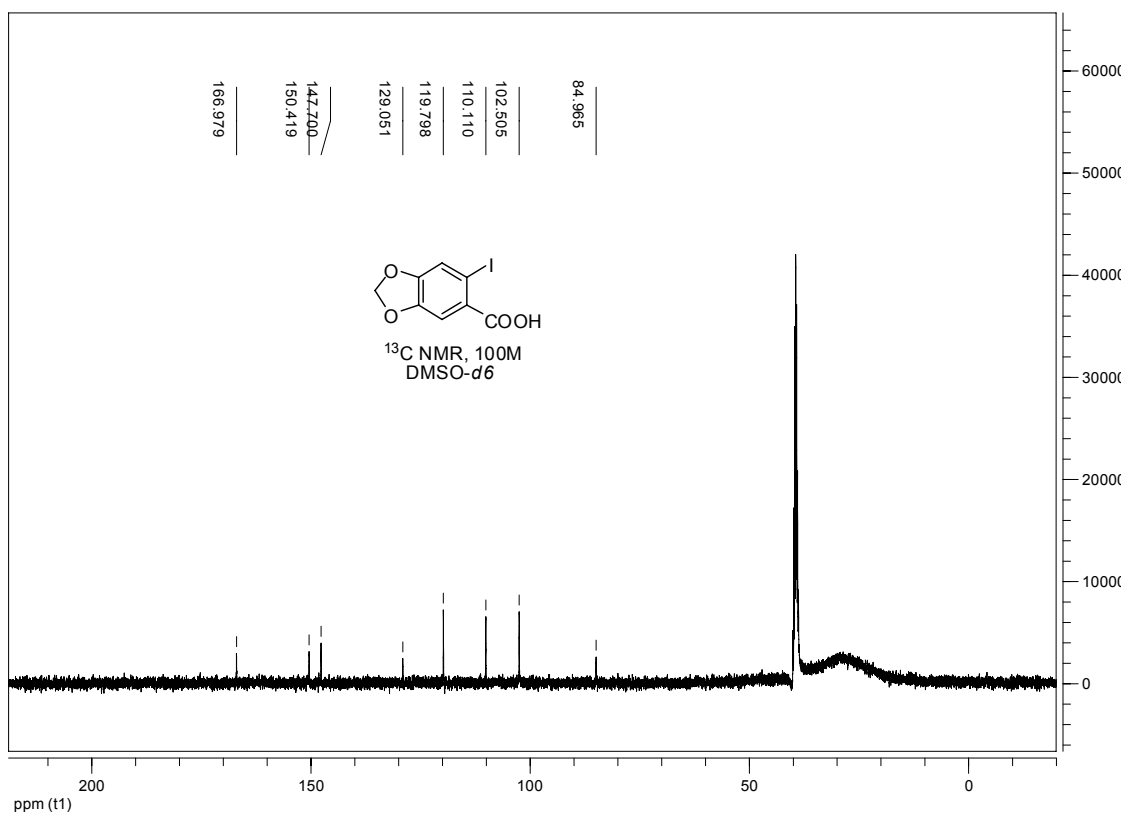

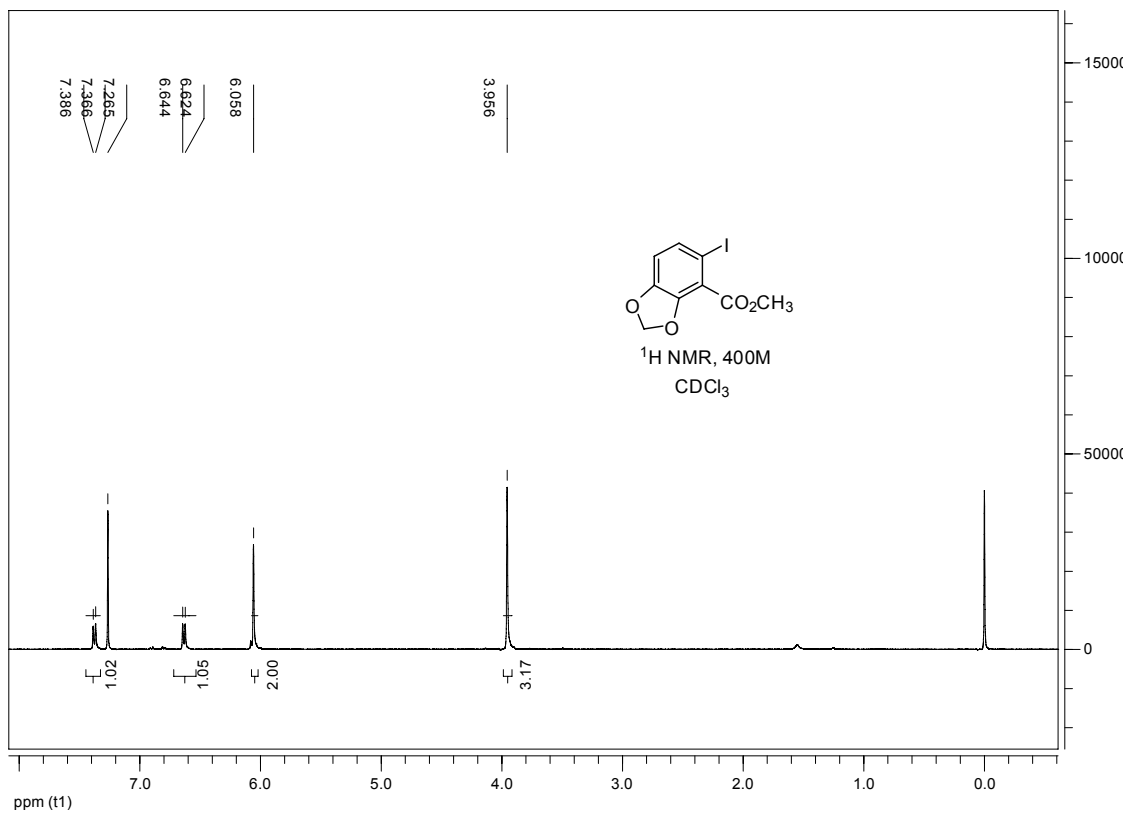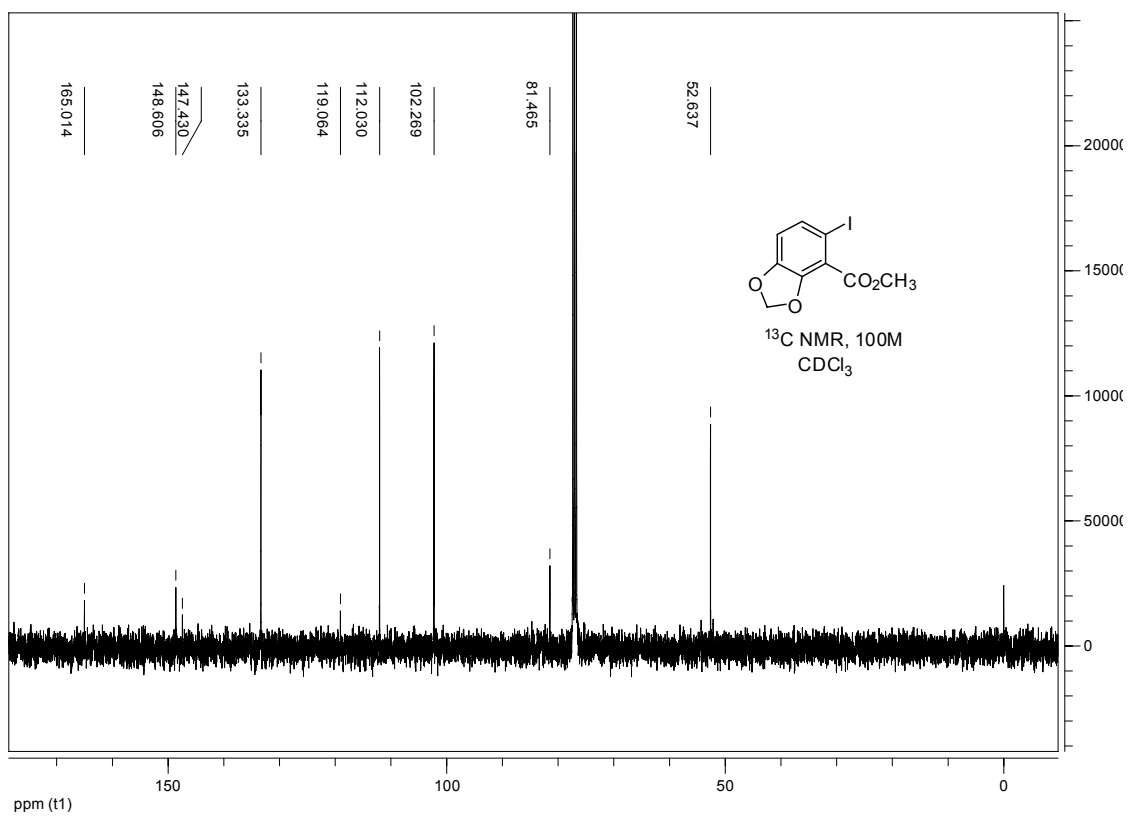

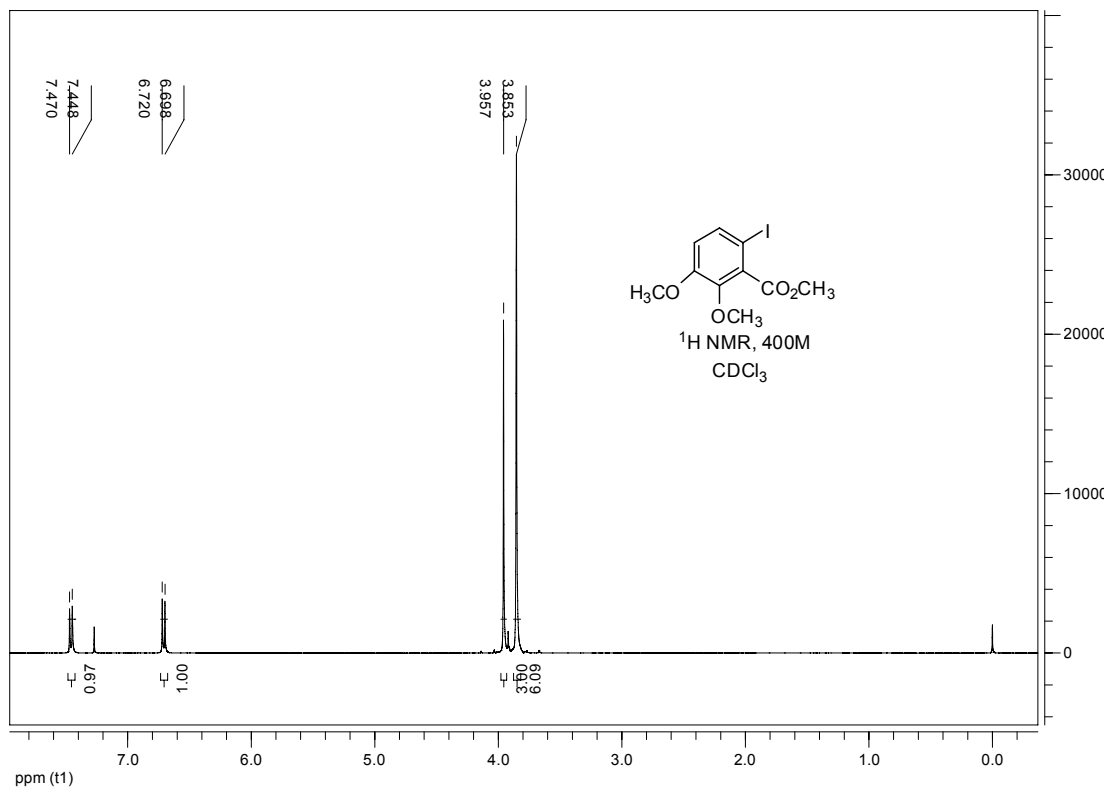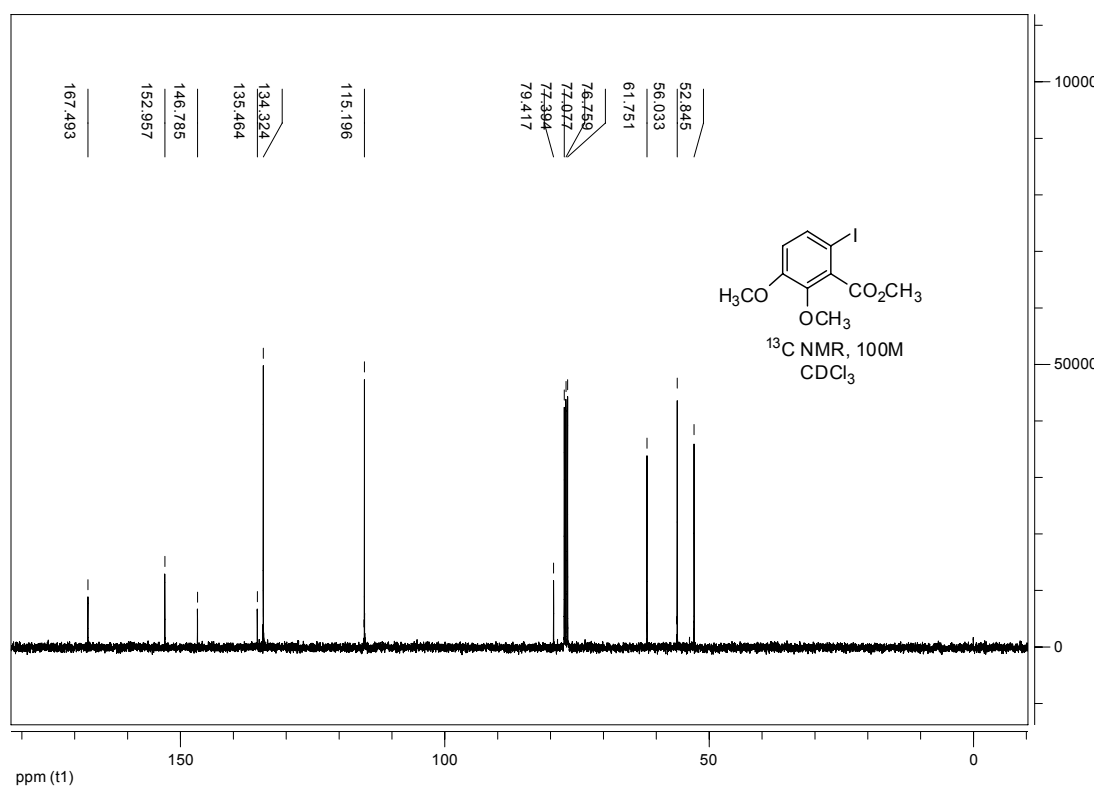



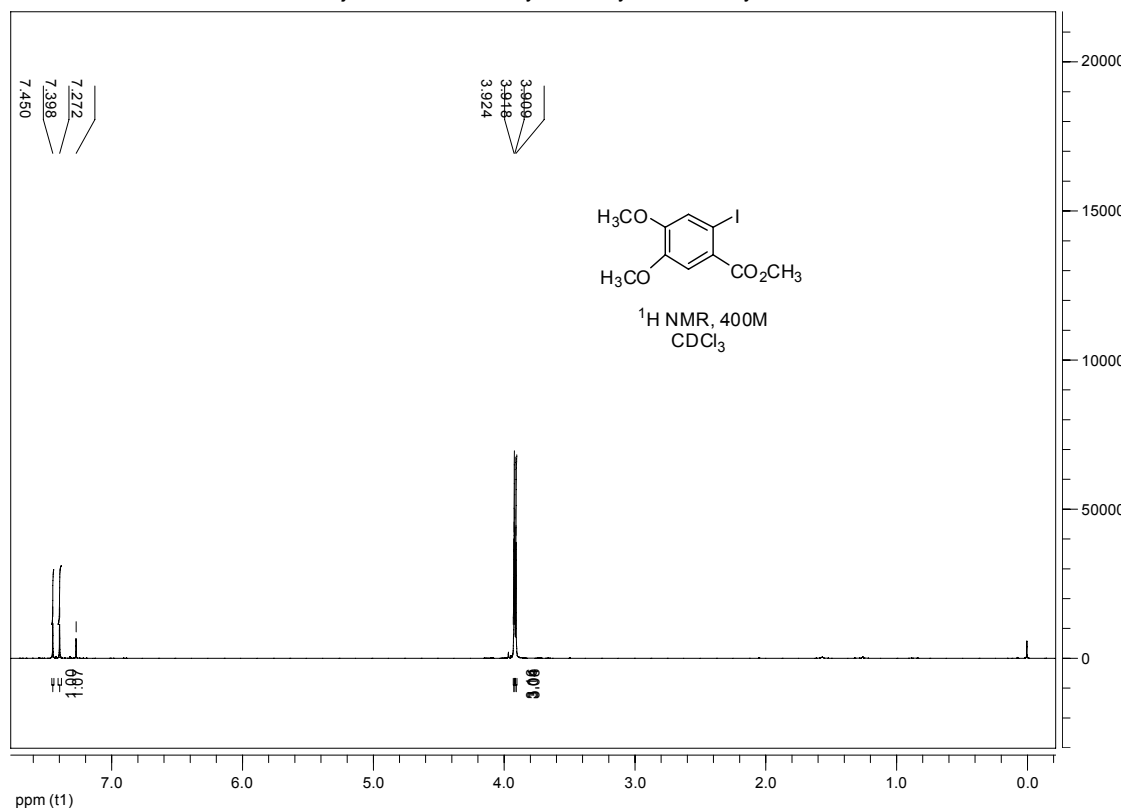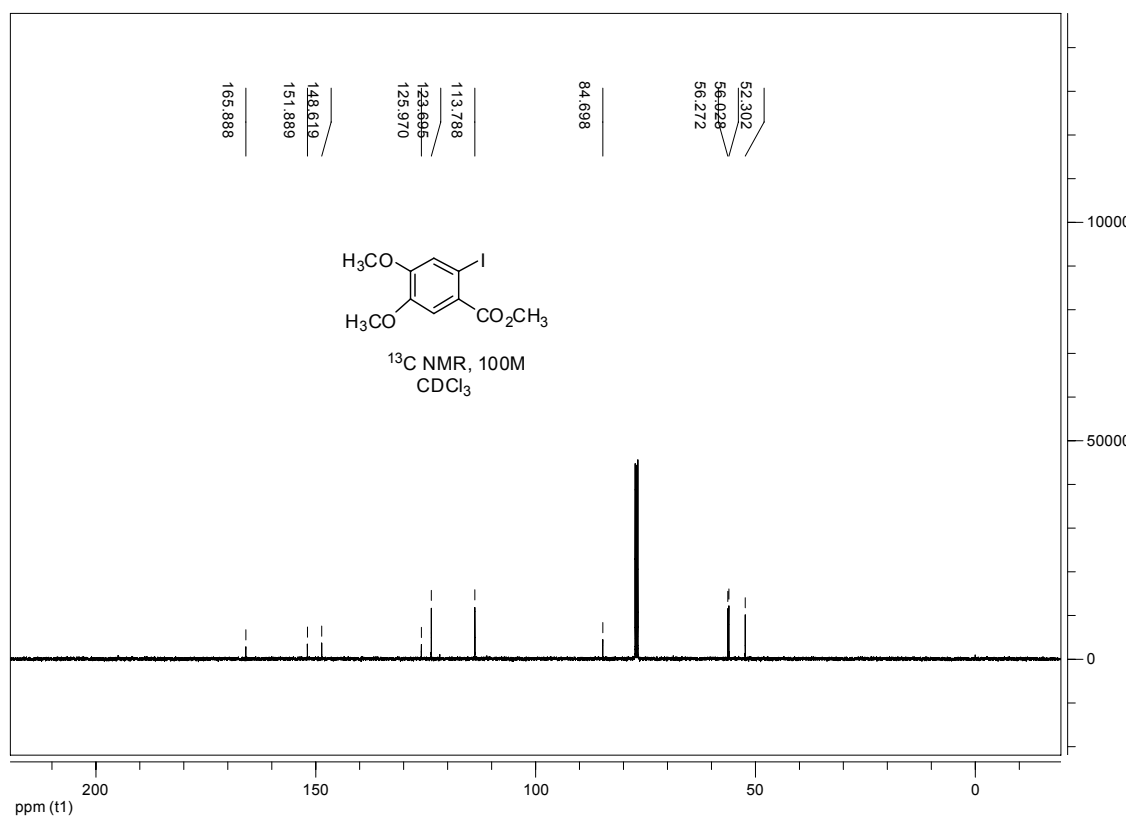

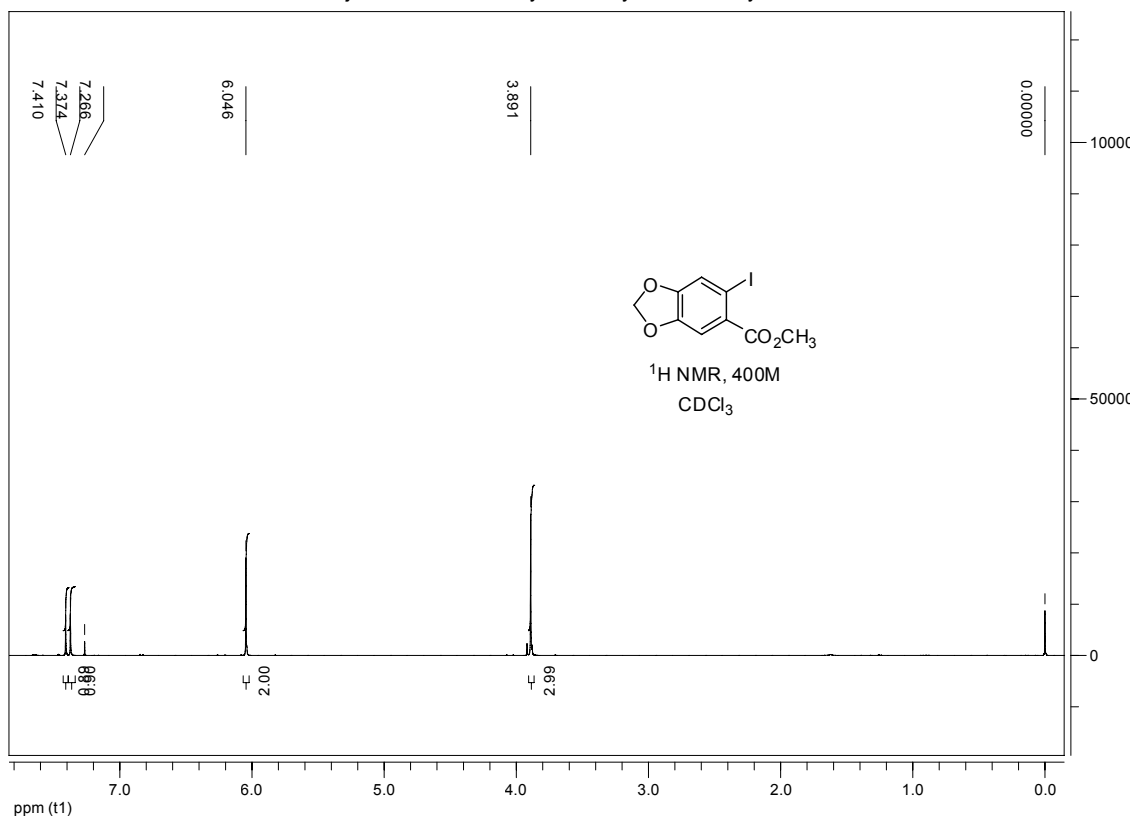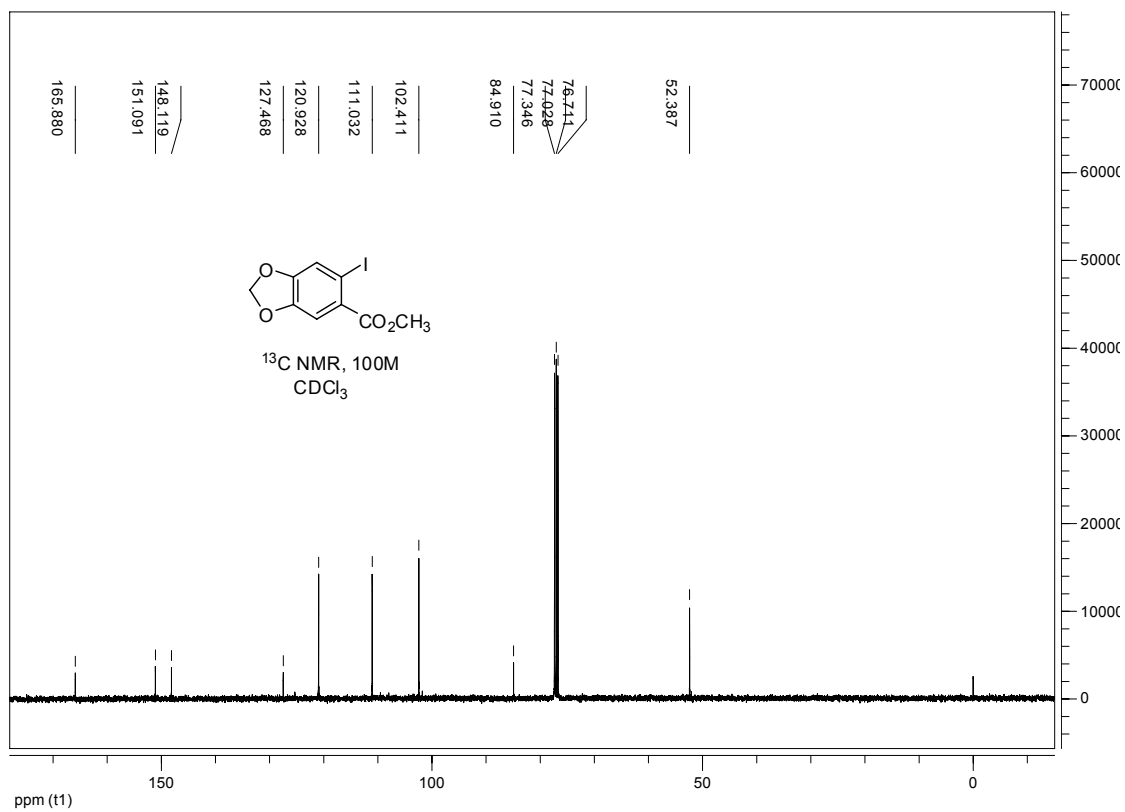

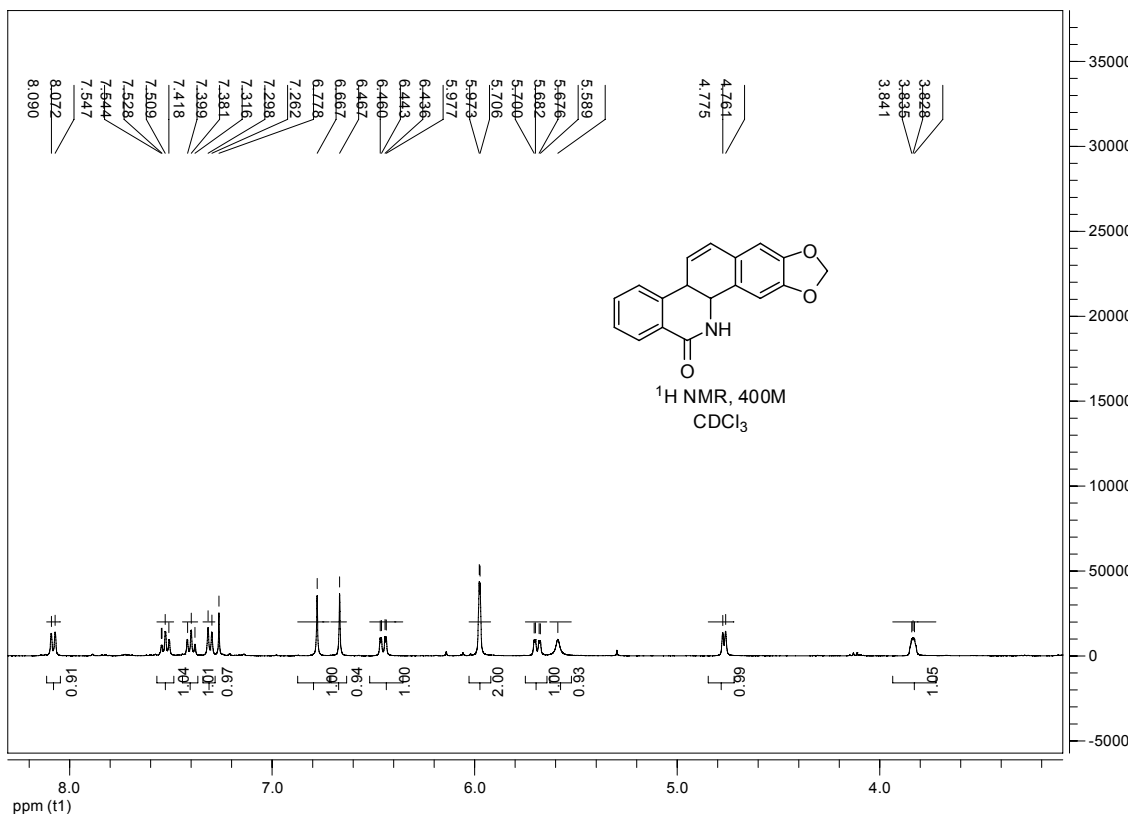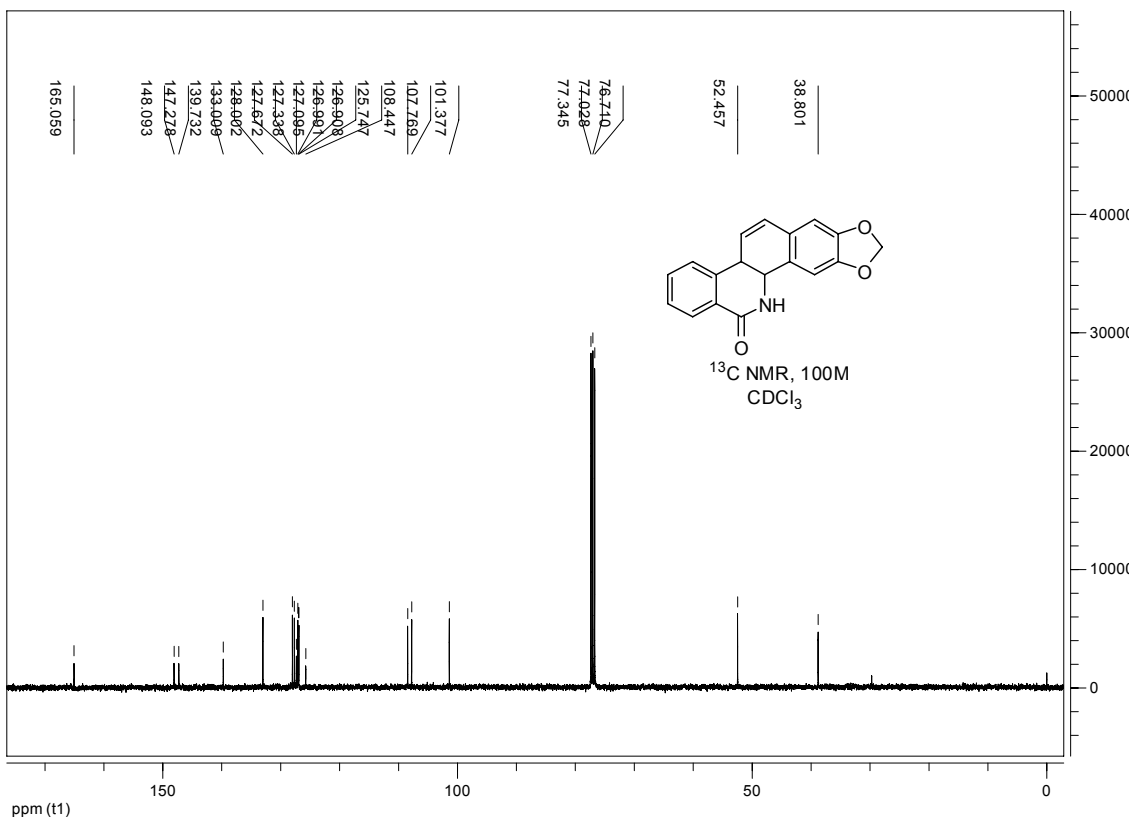

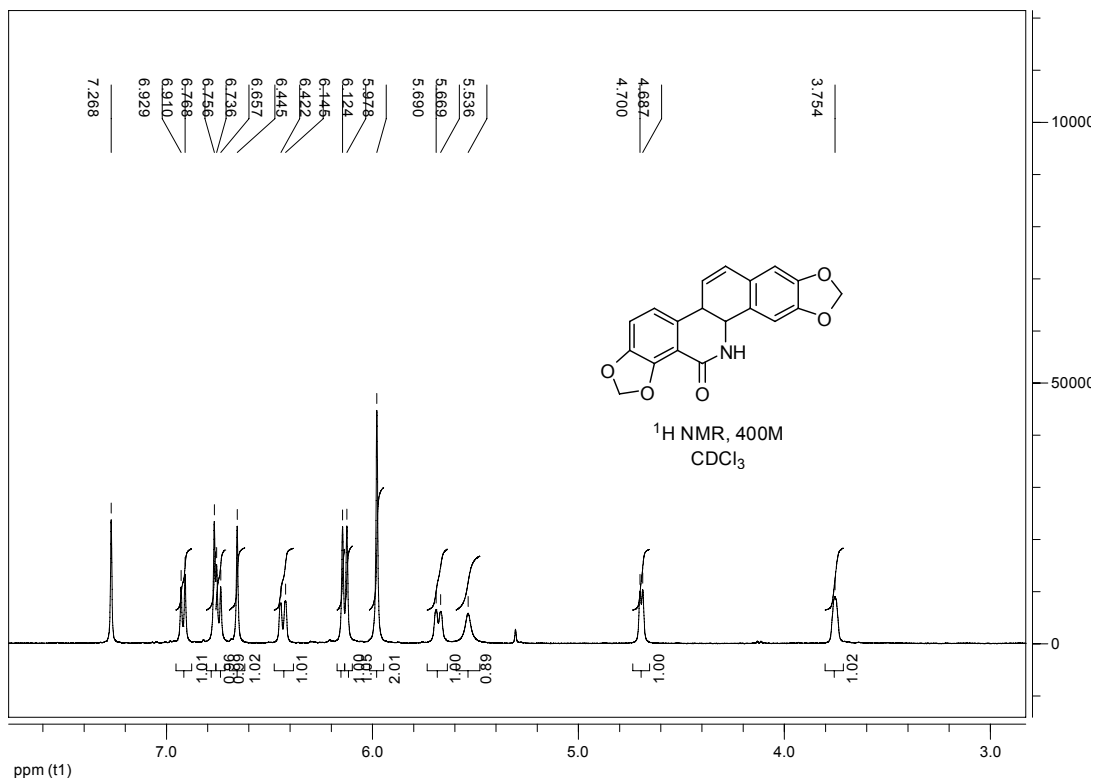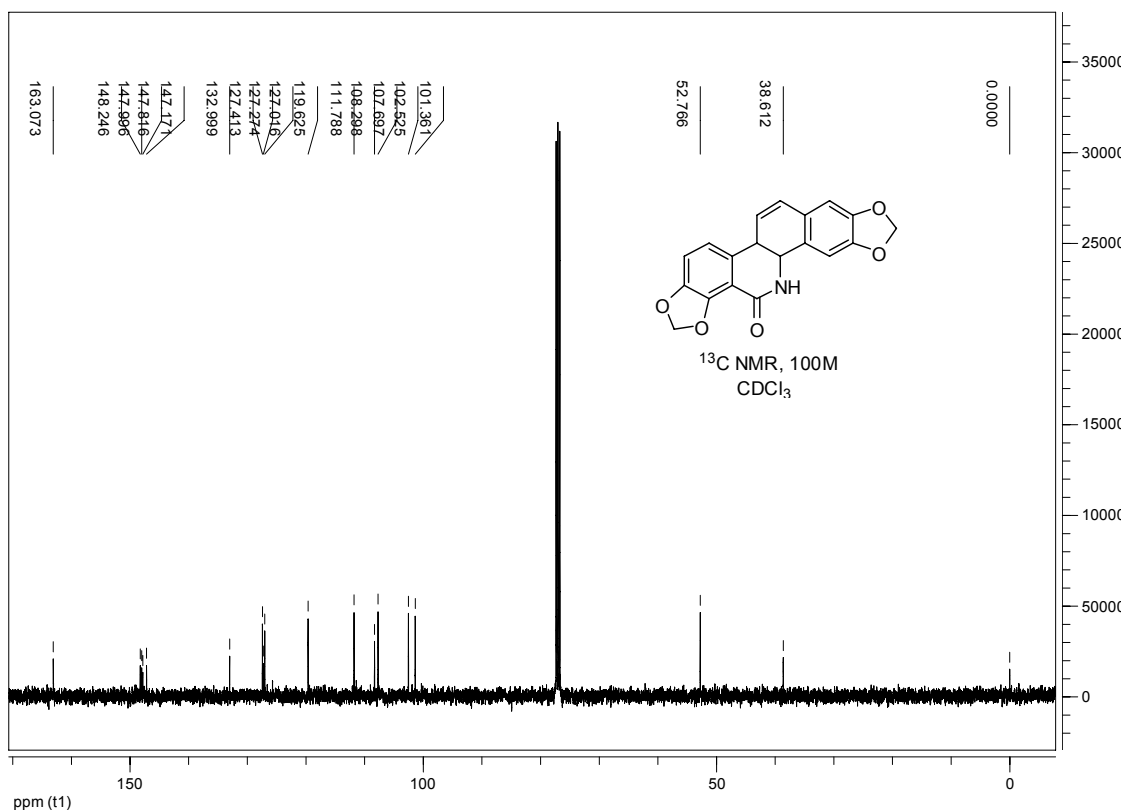

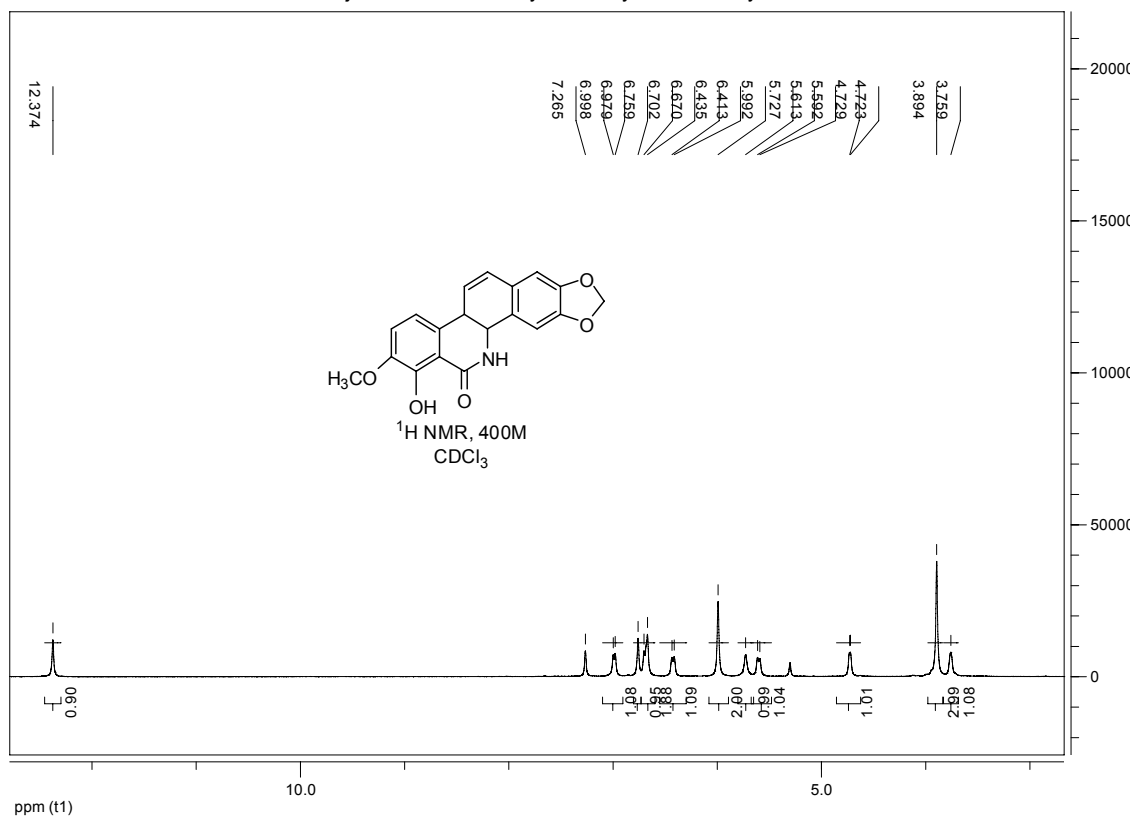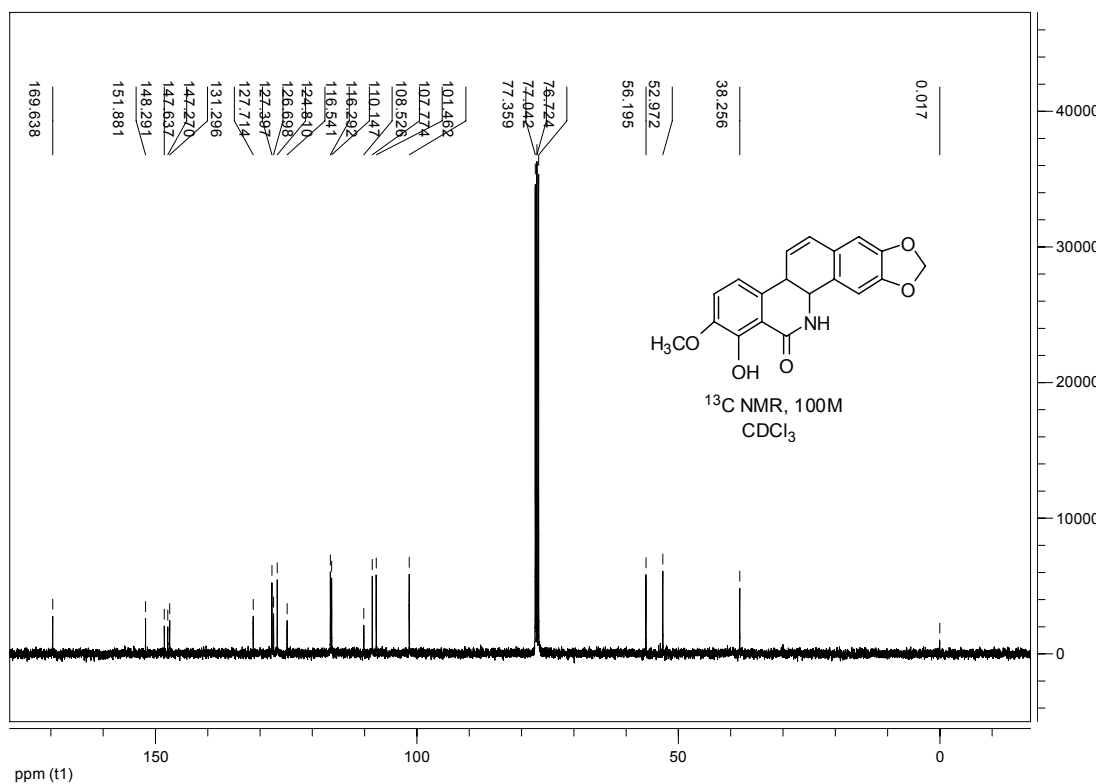

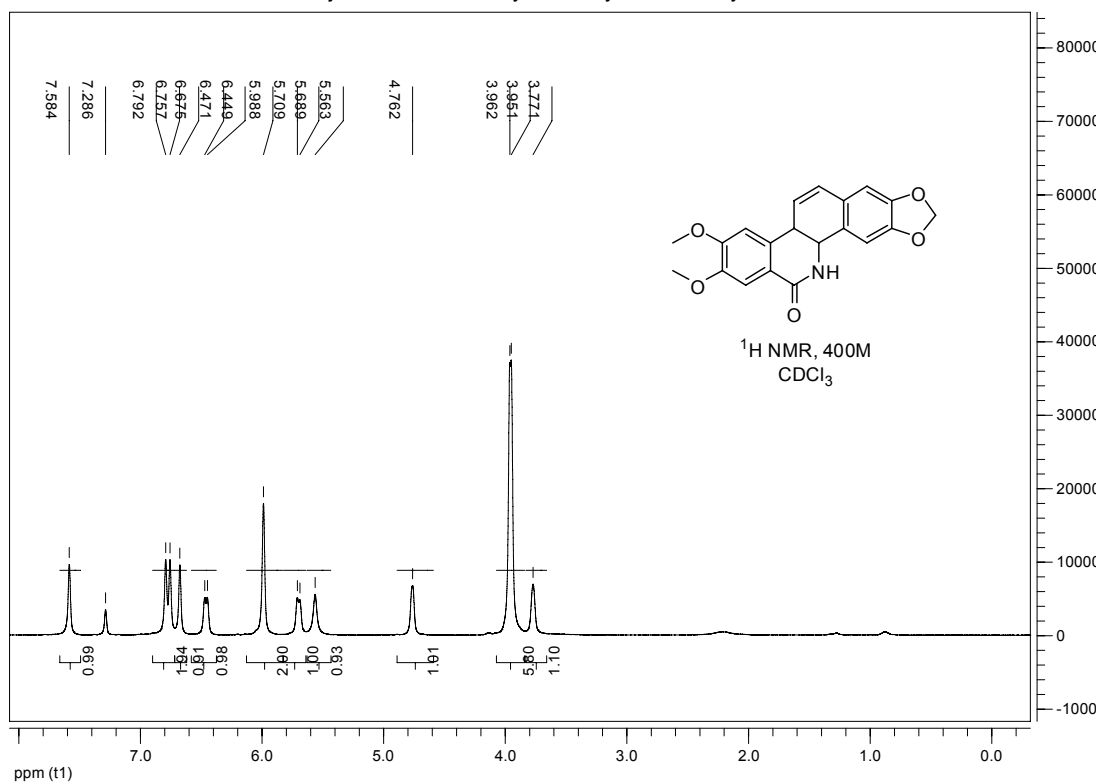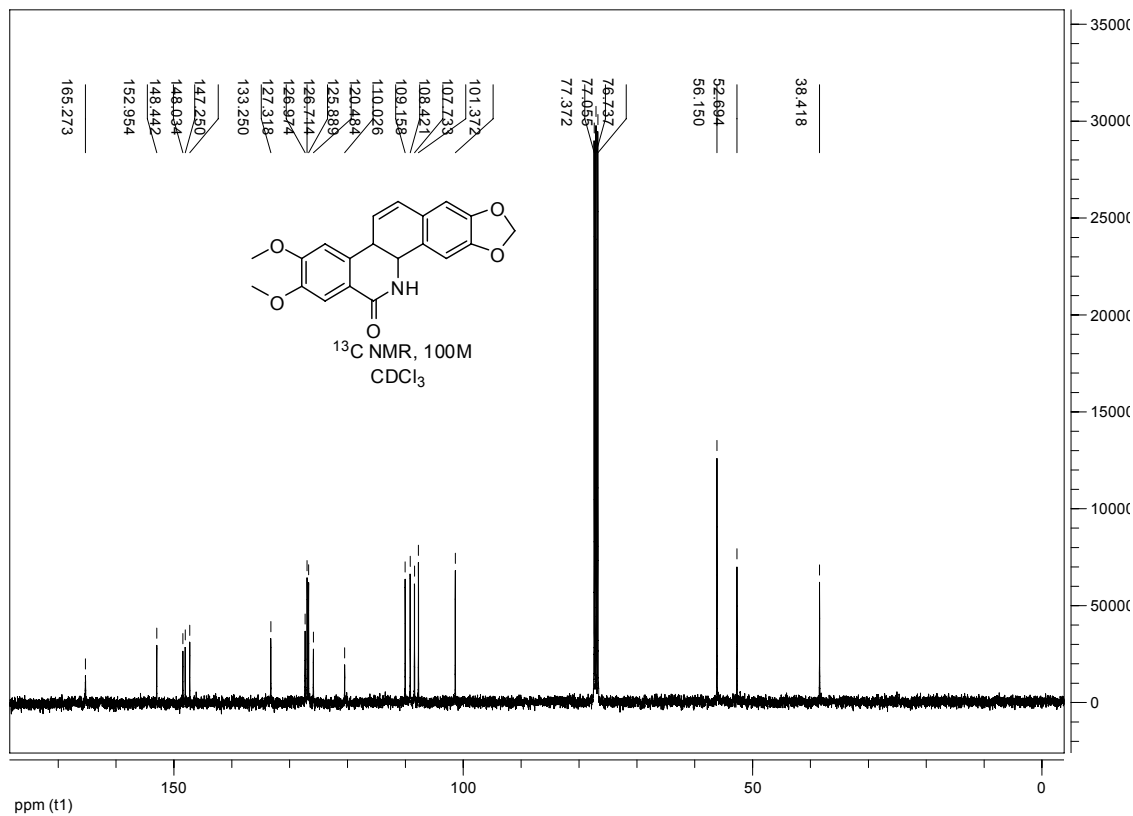

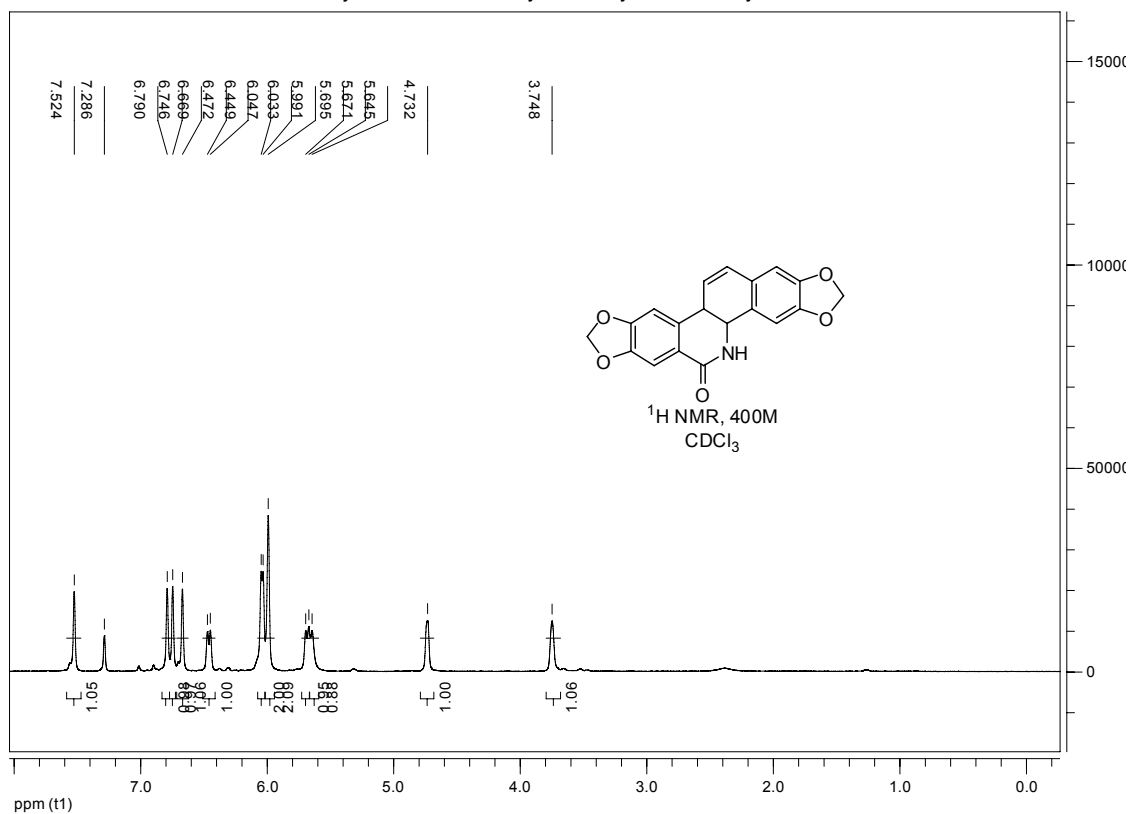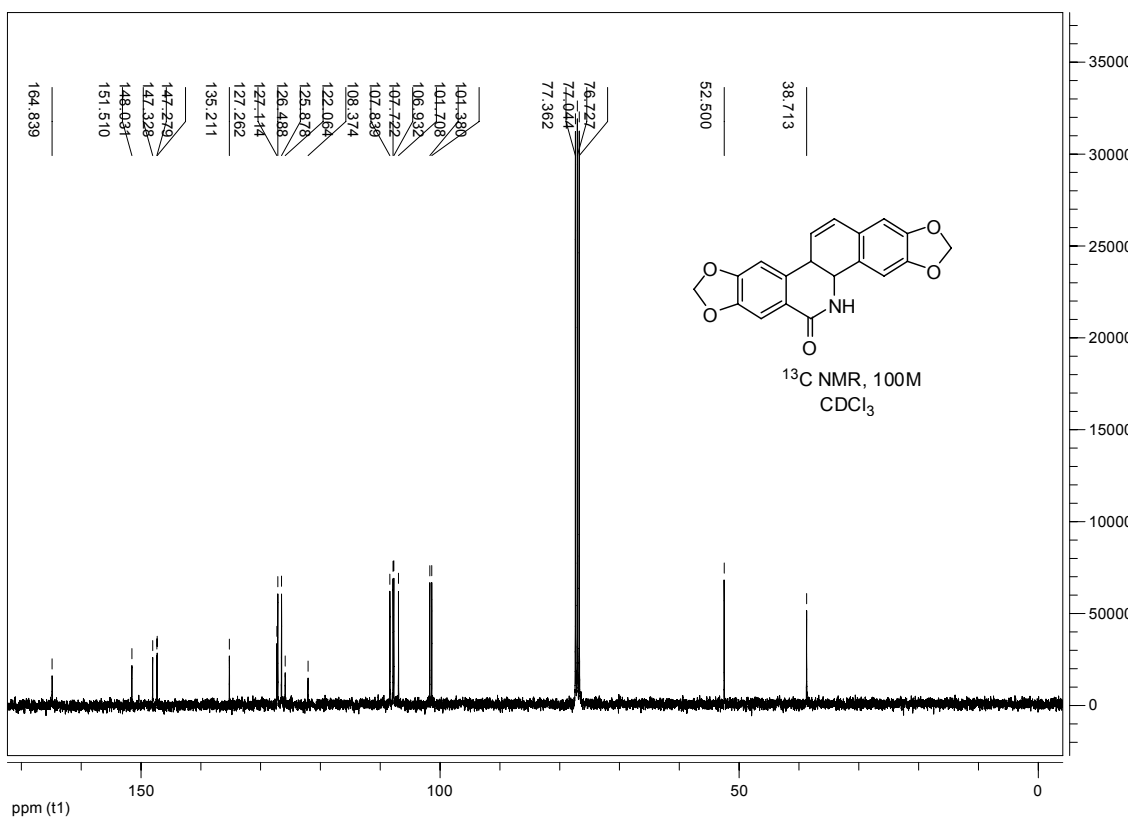

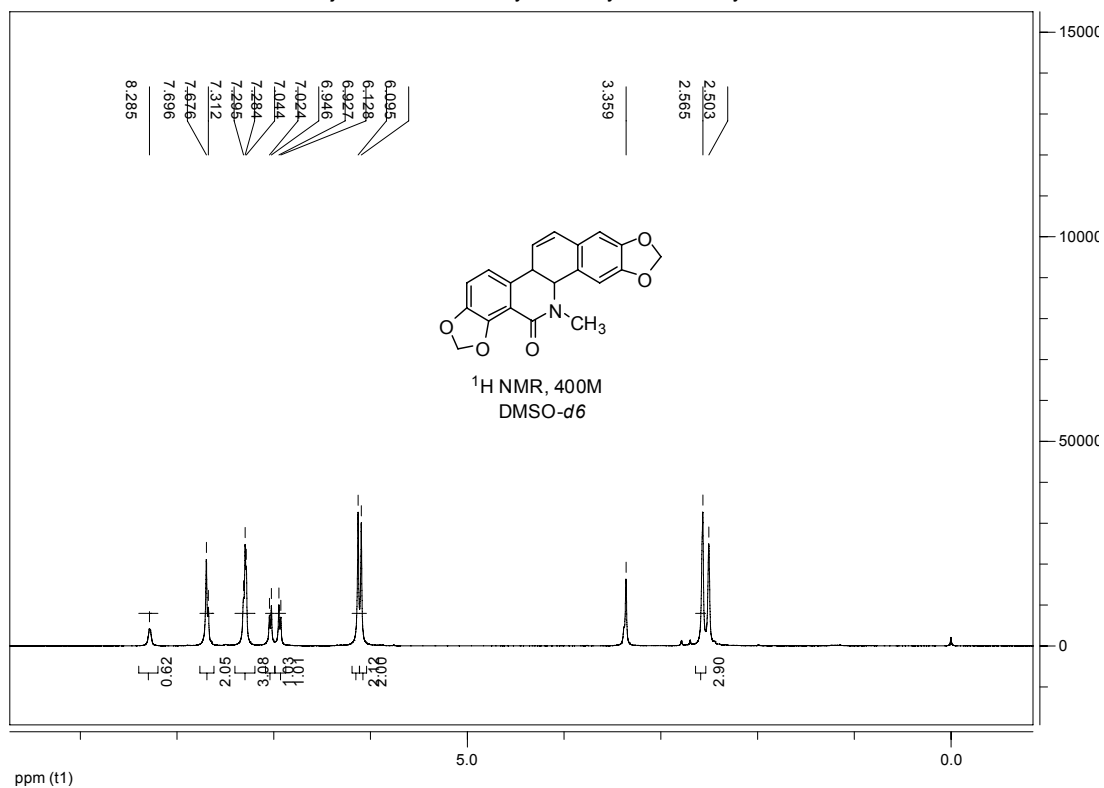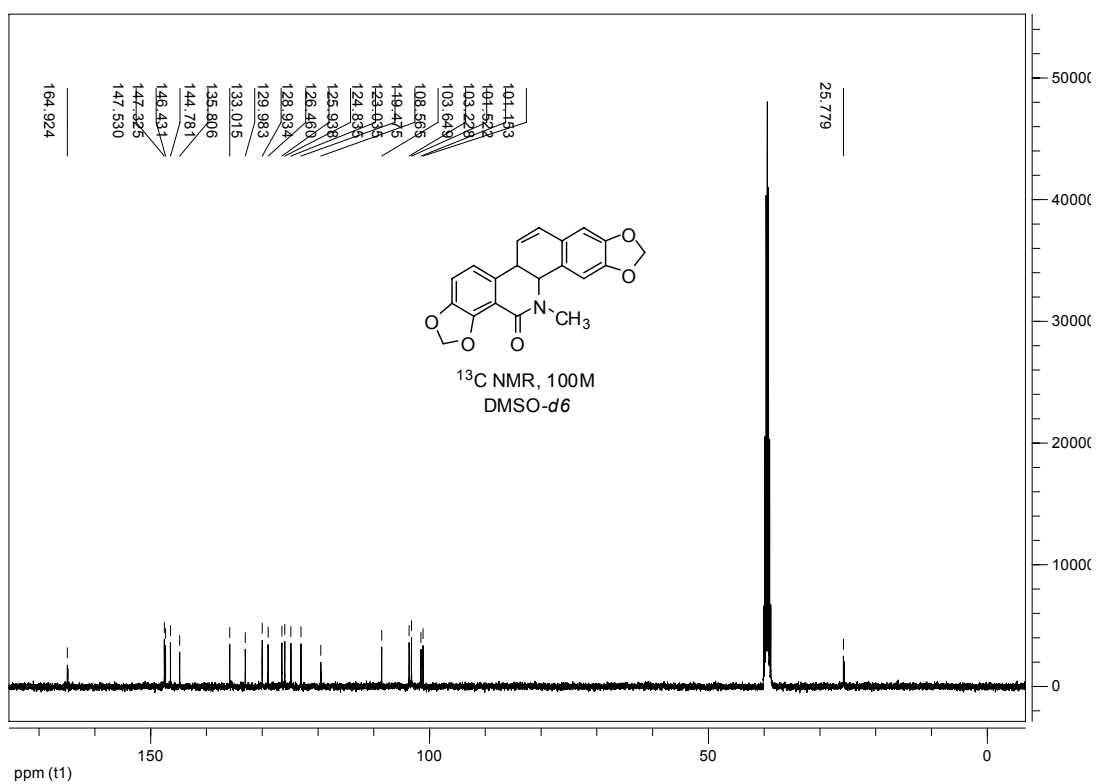



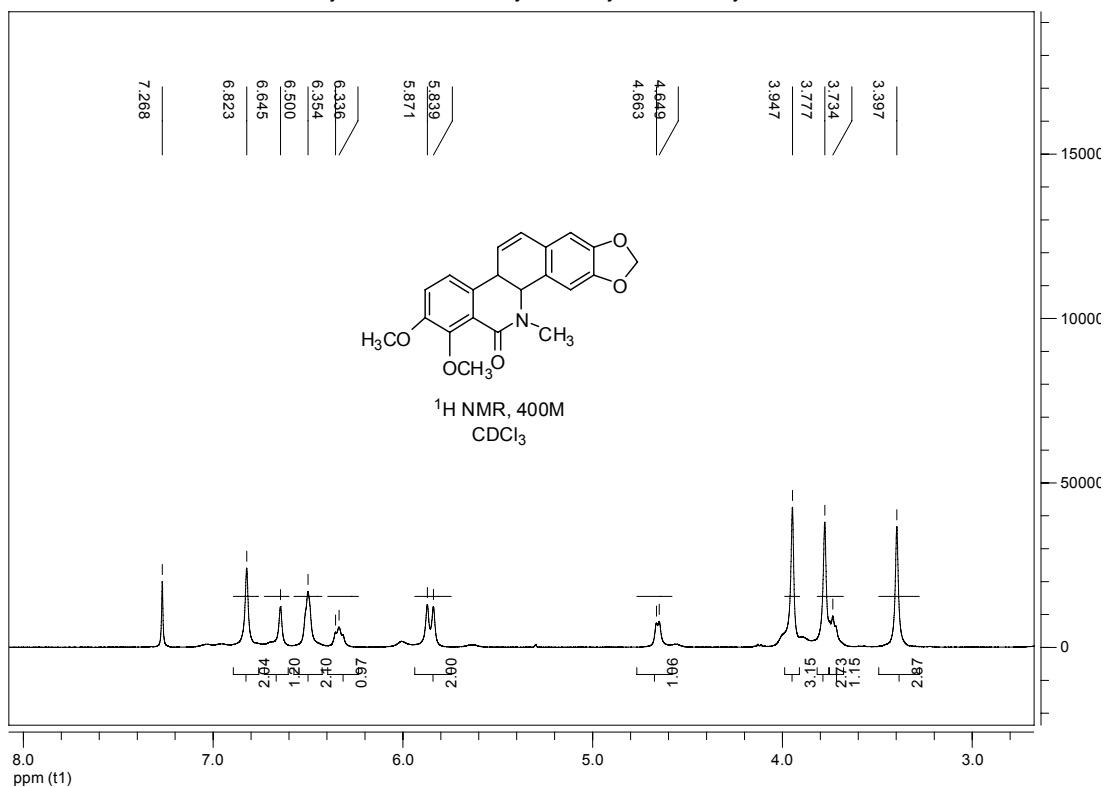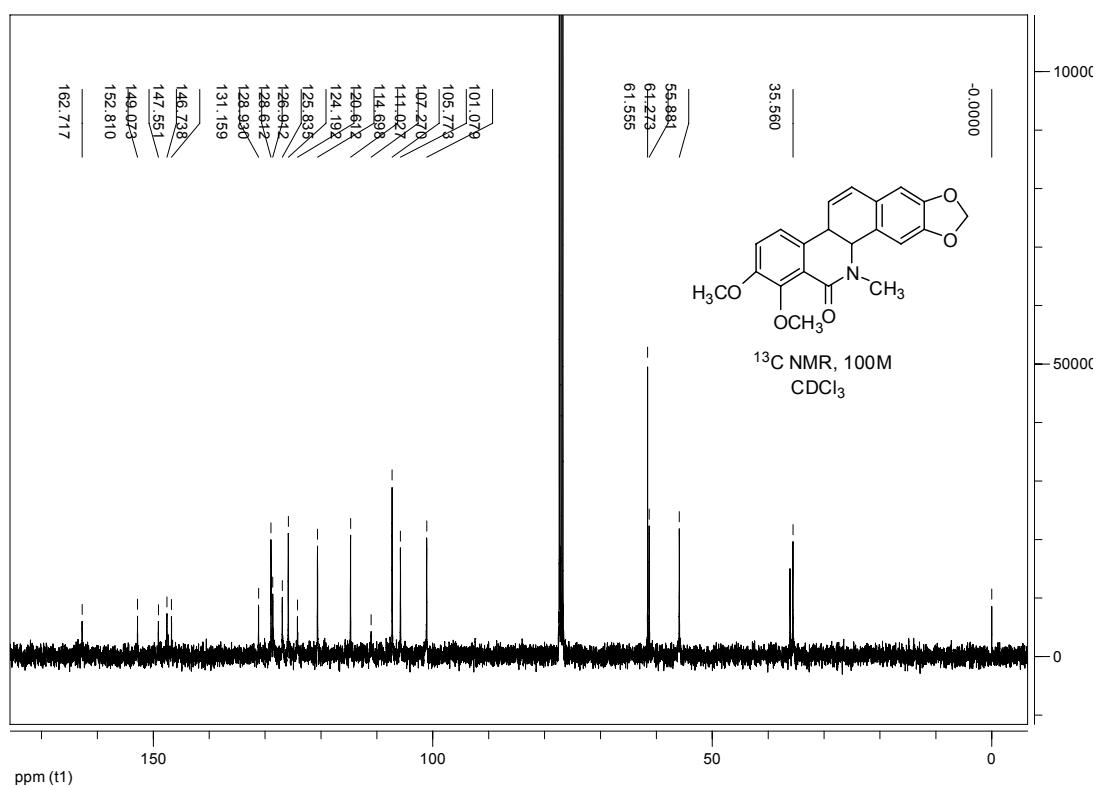

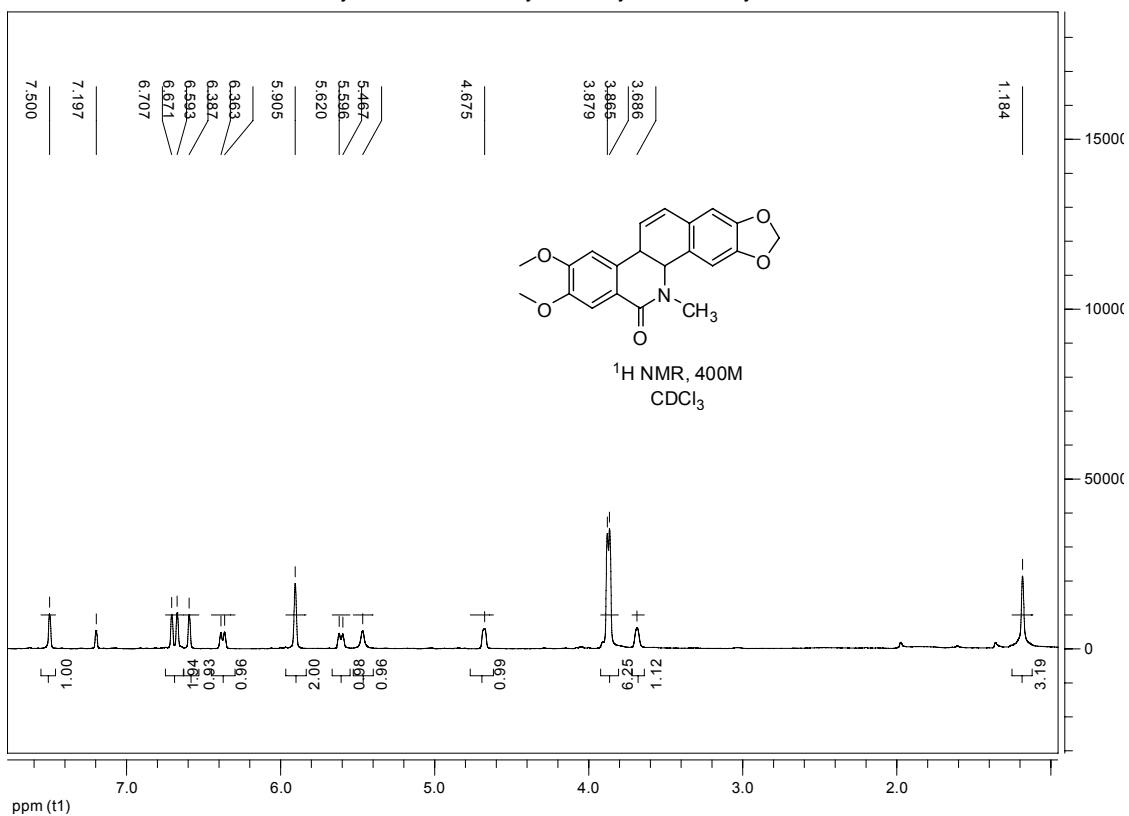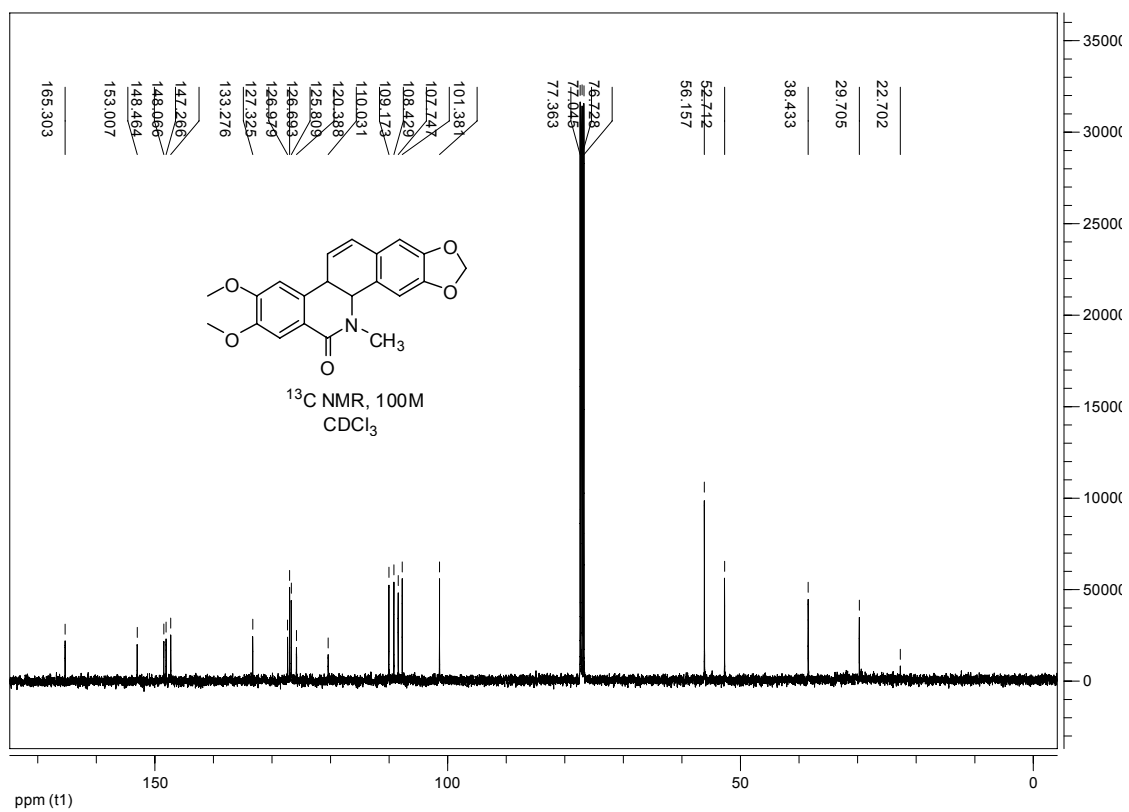

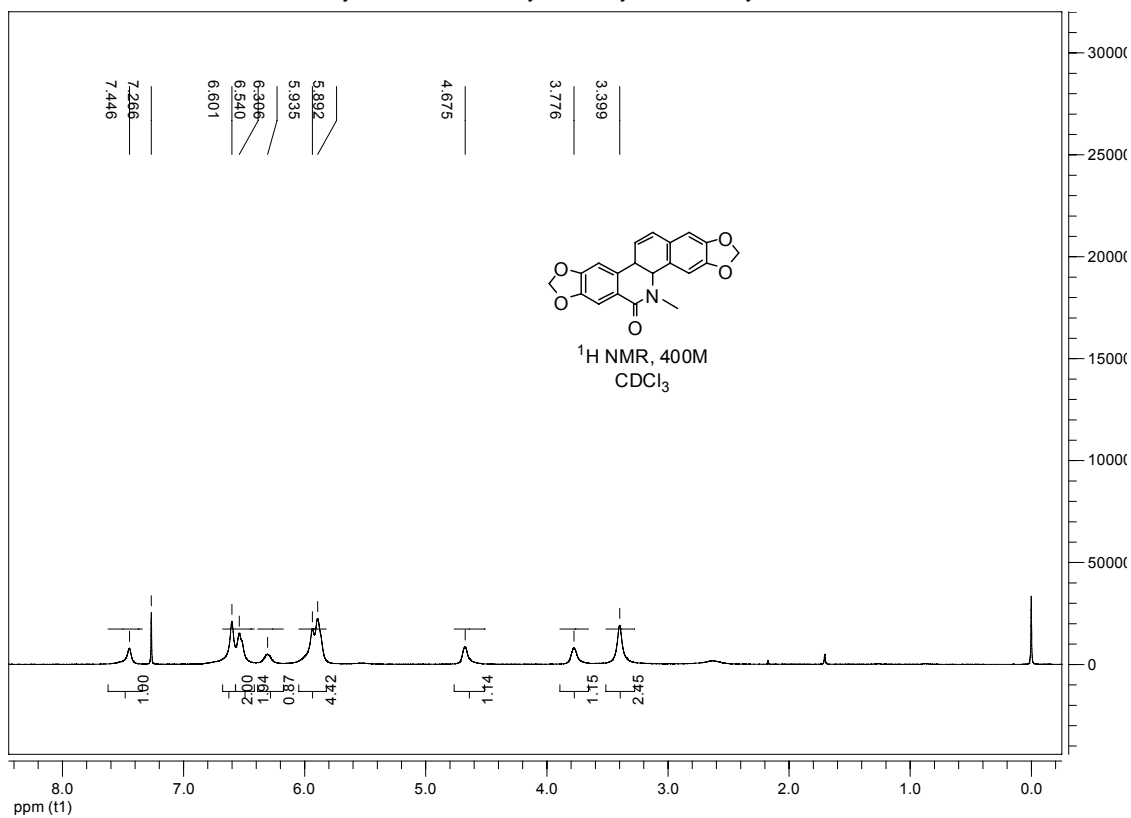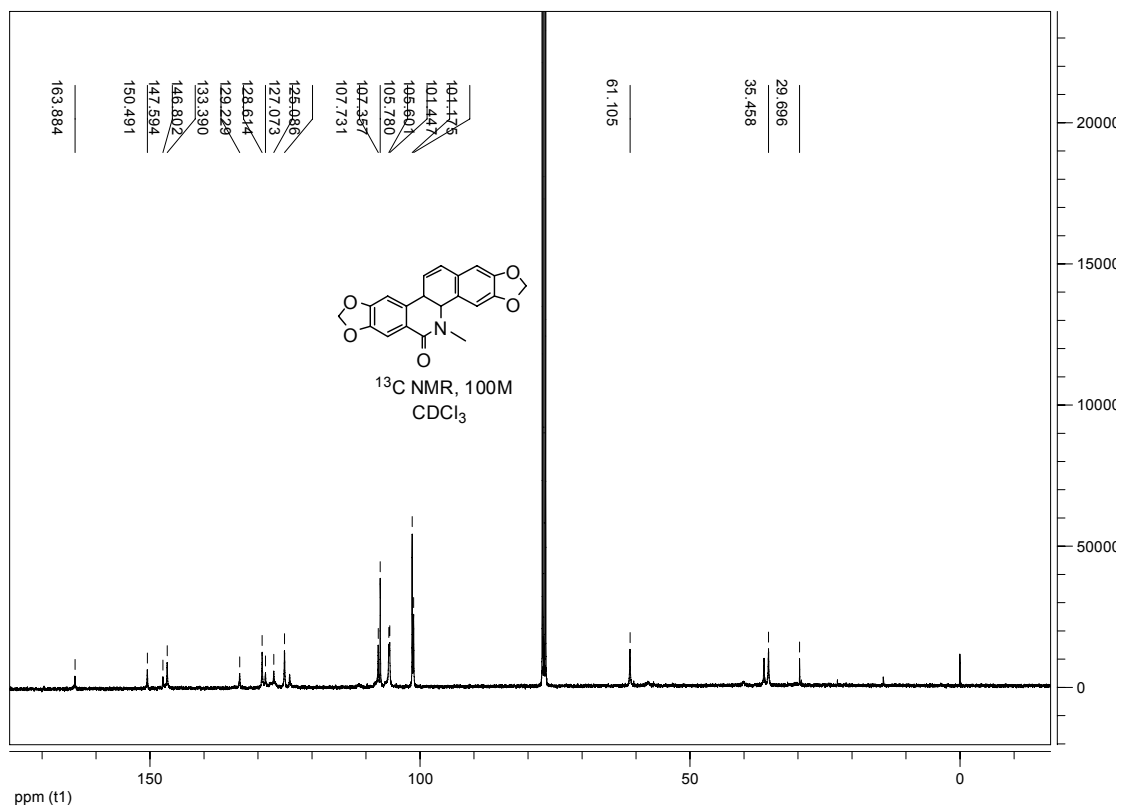

Oxysanguinarine

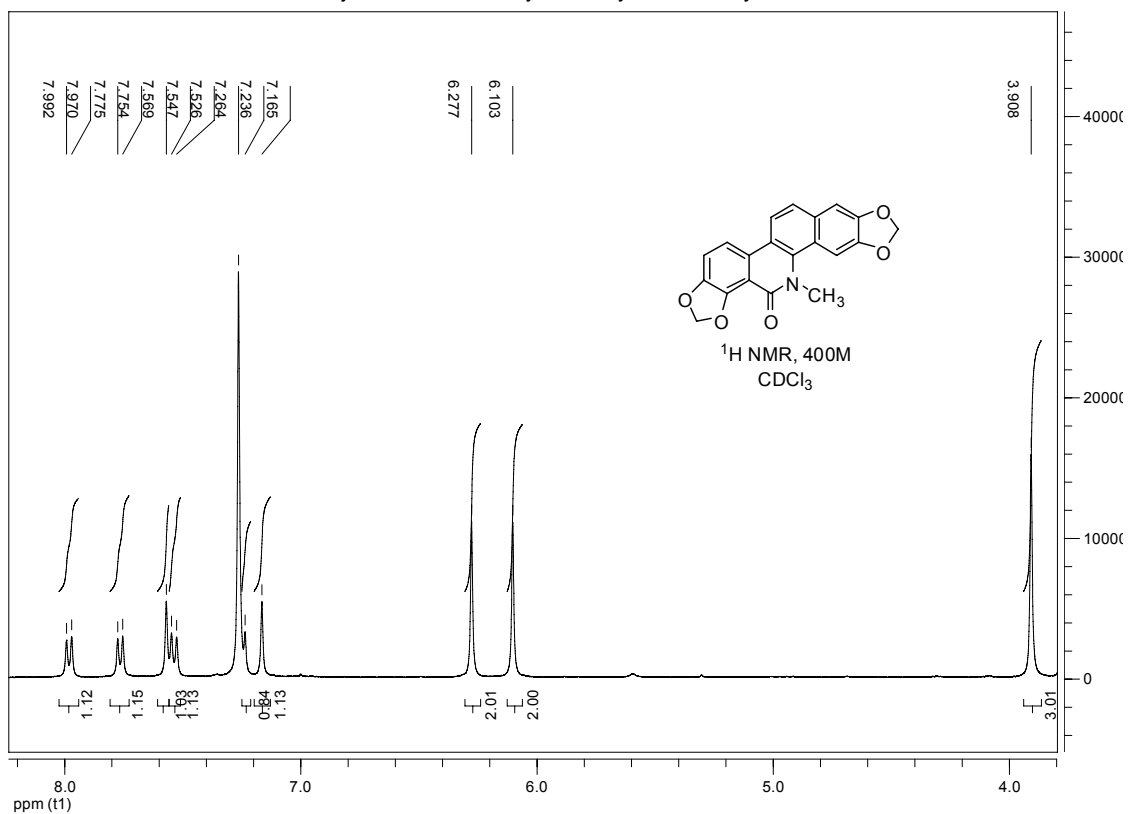

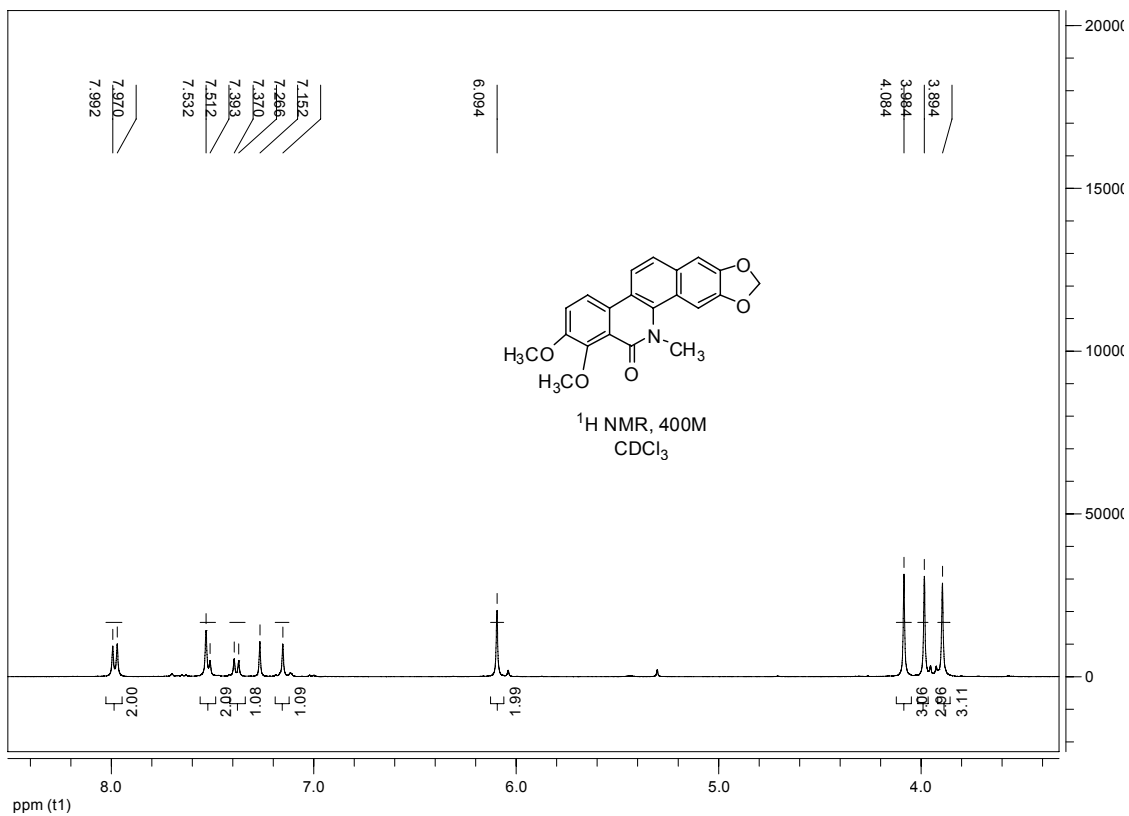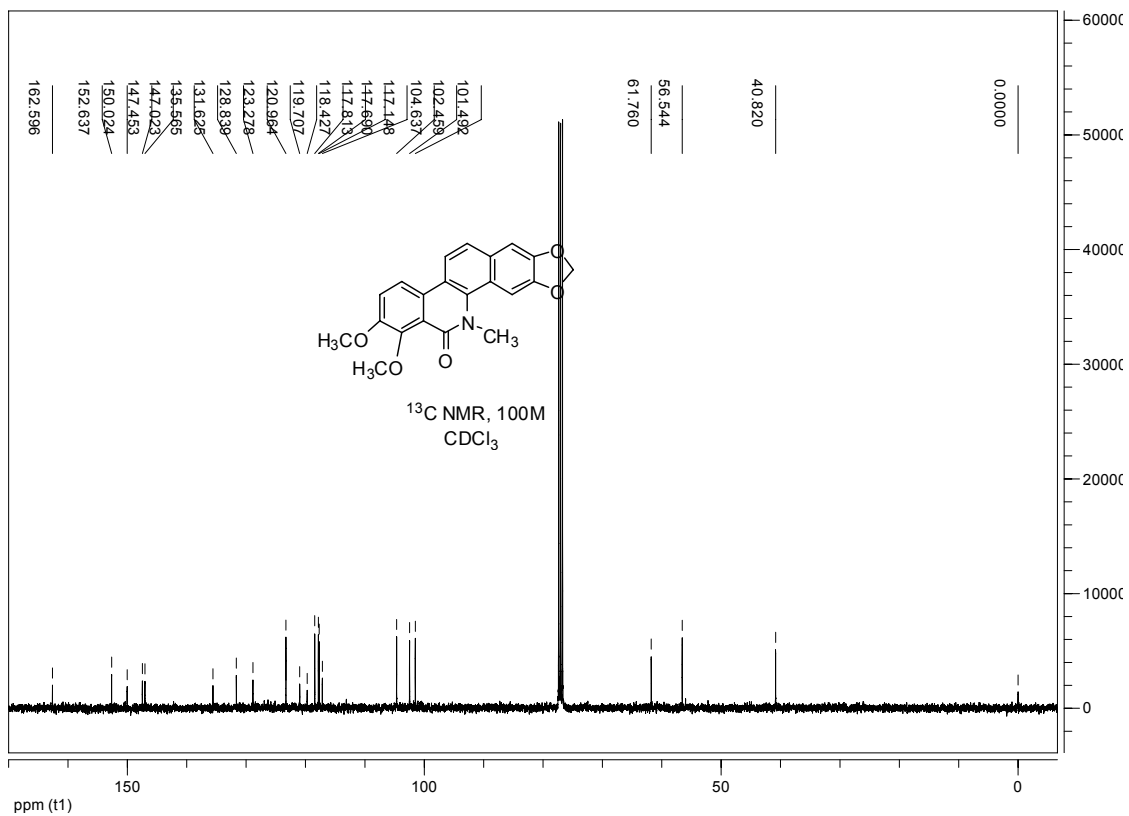

Oxynitidine

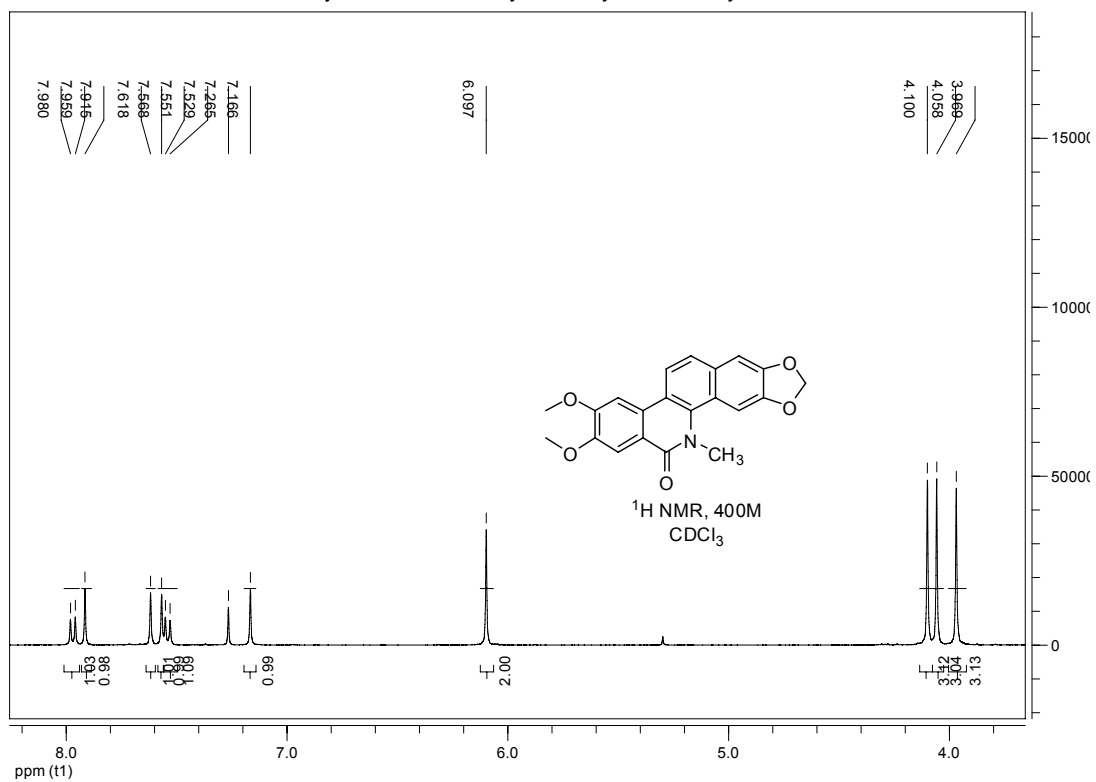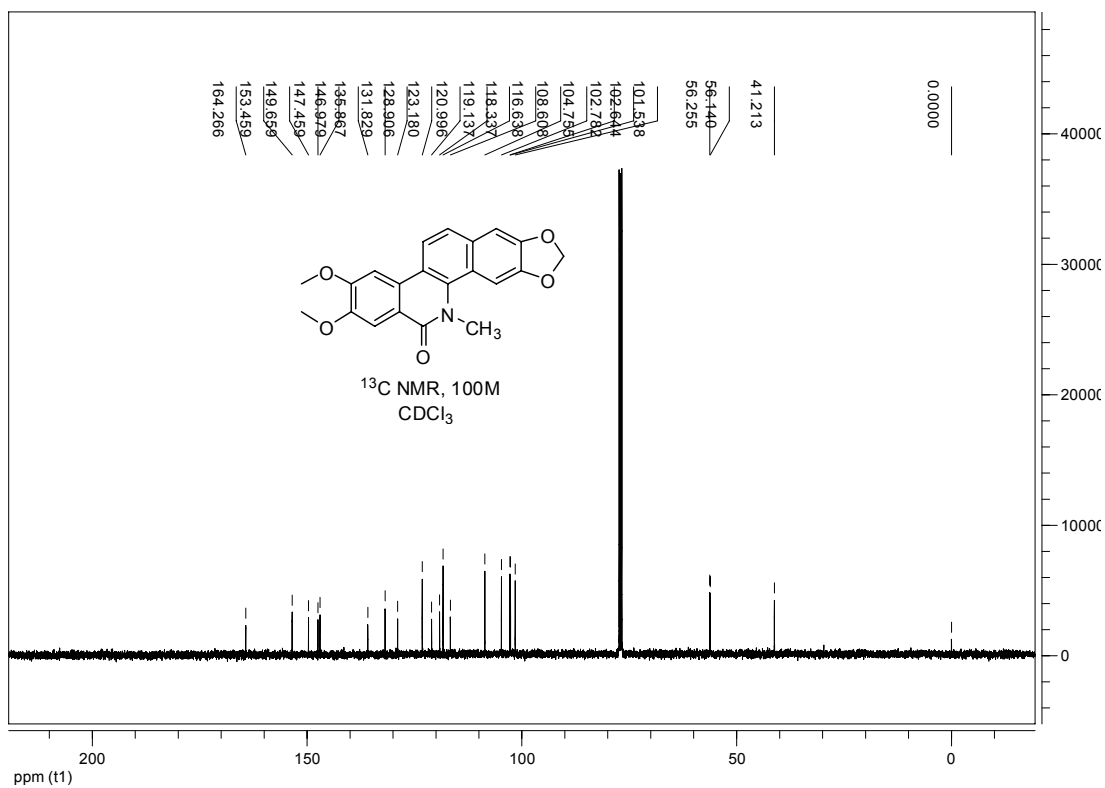

Oxyvicine

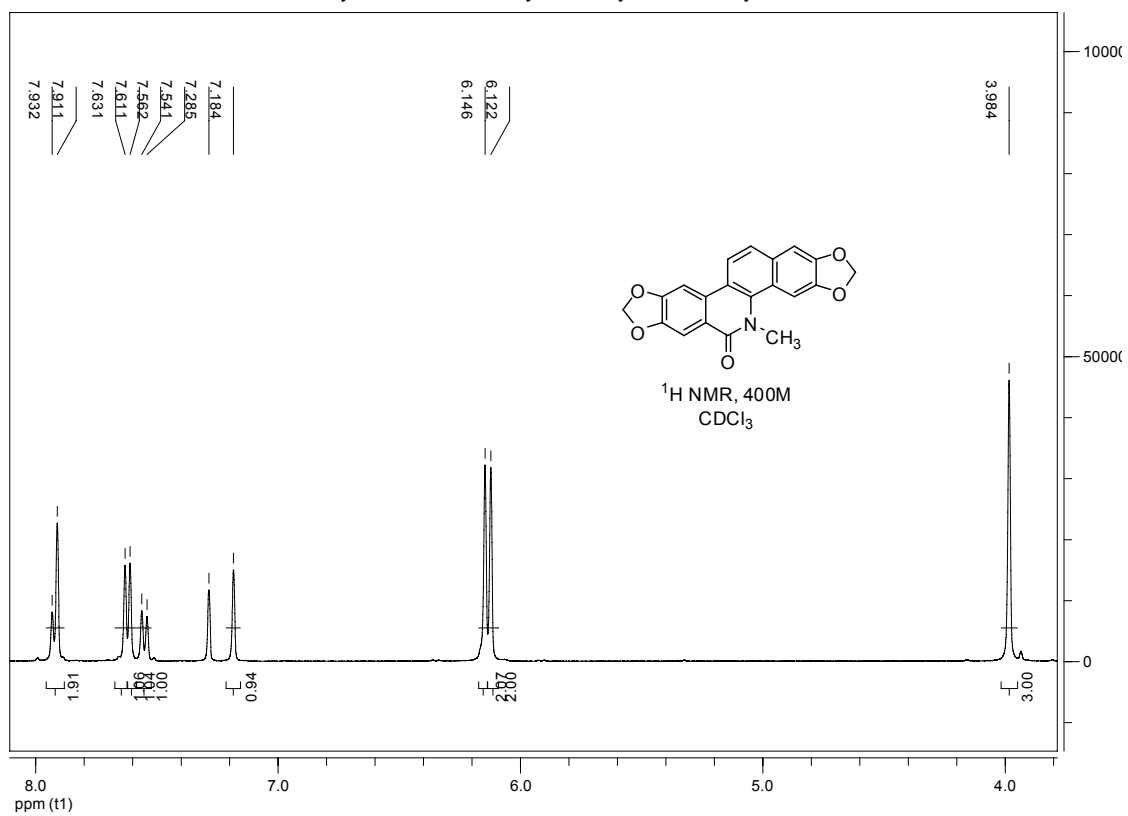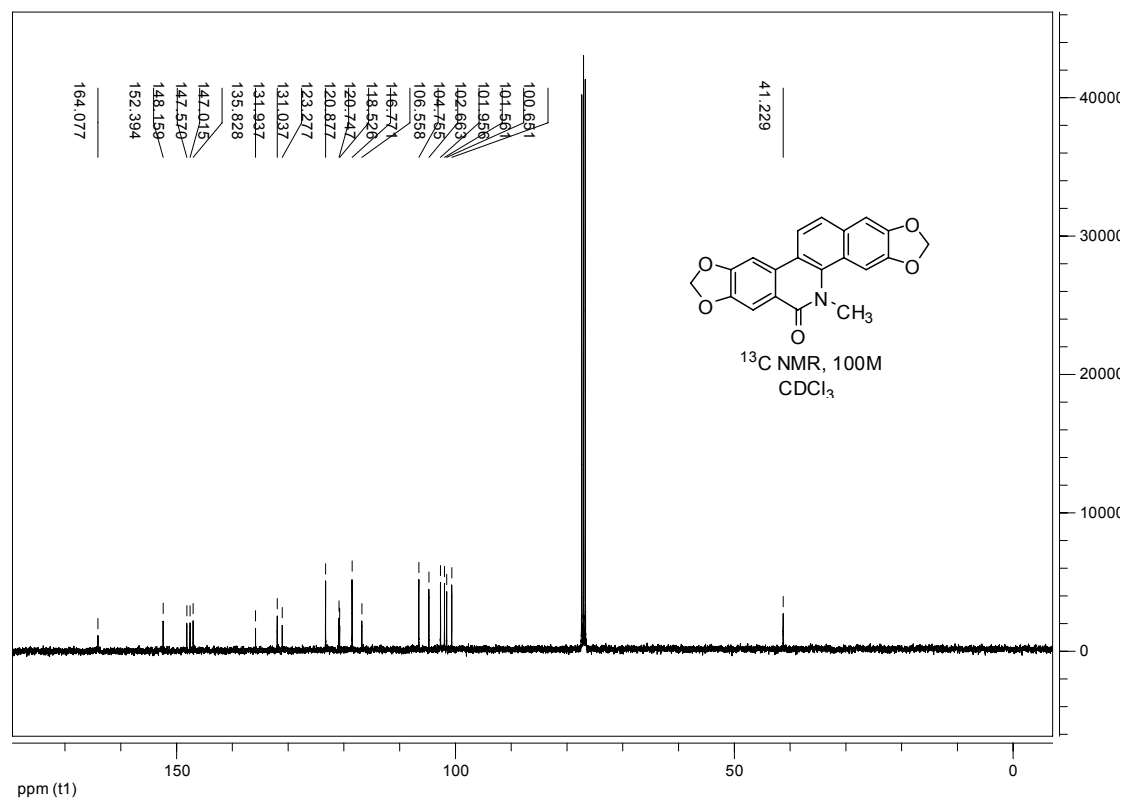

Sanguinarine Chloride

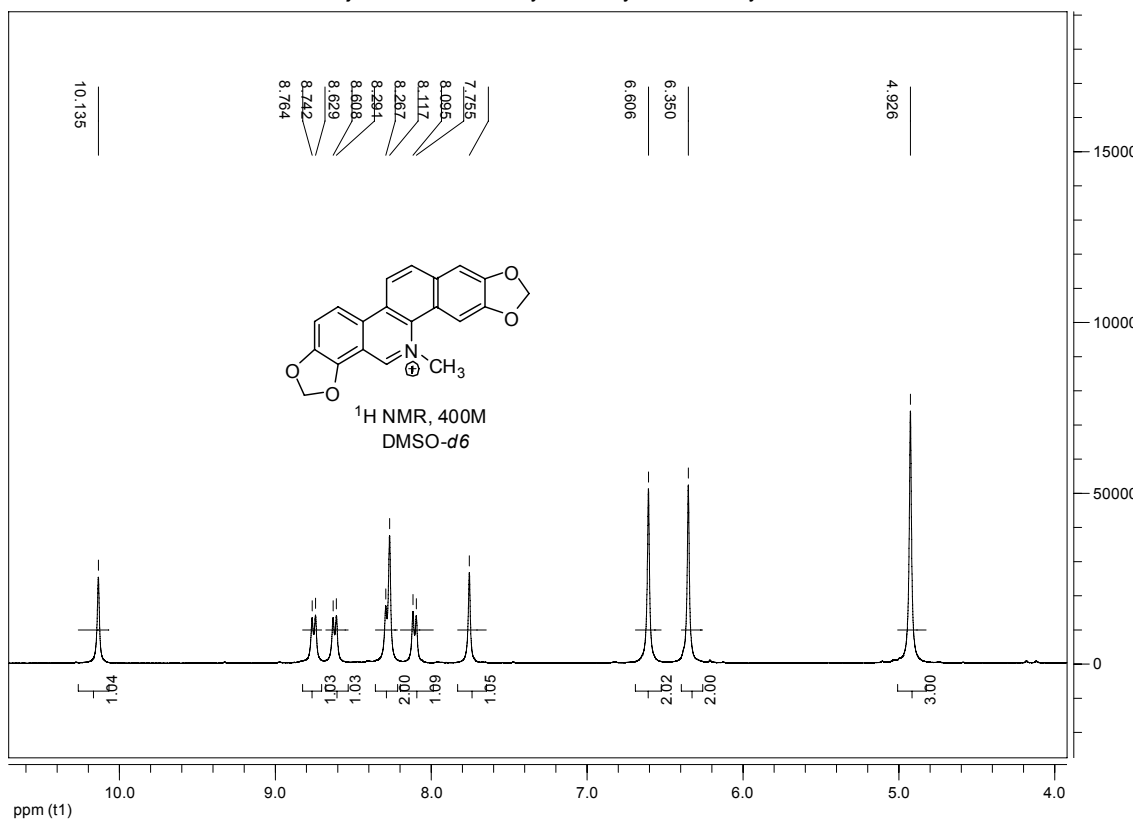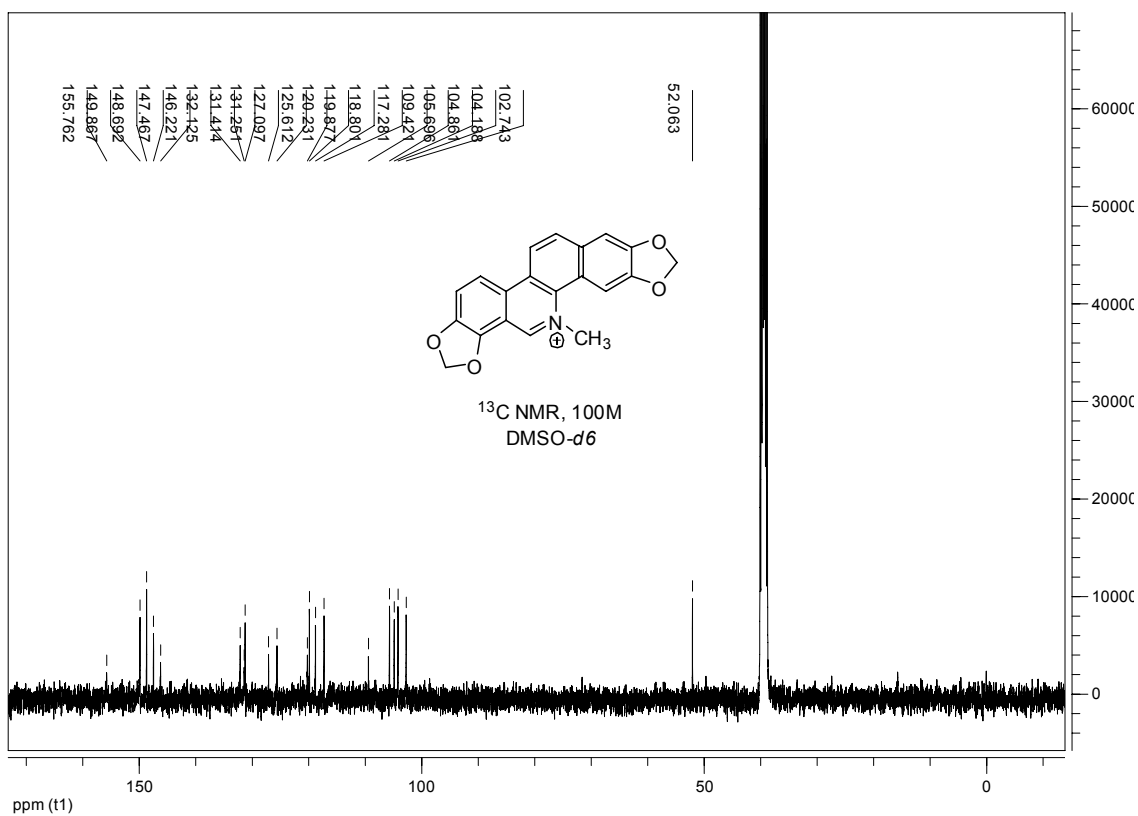

Chelerythrine Chloride



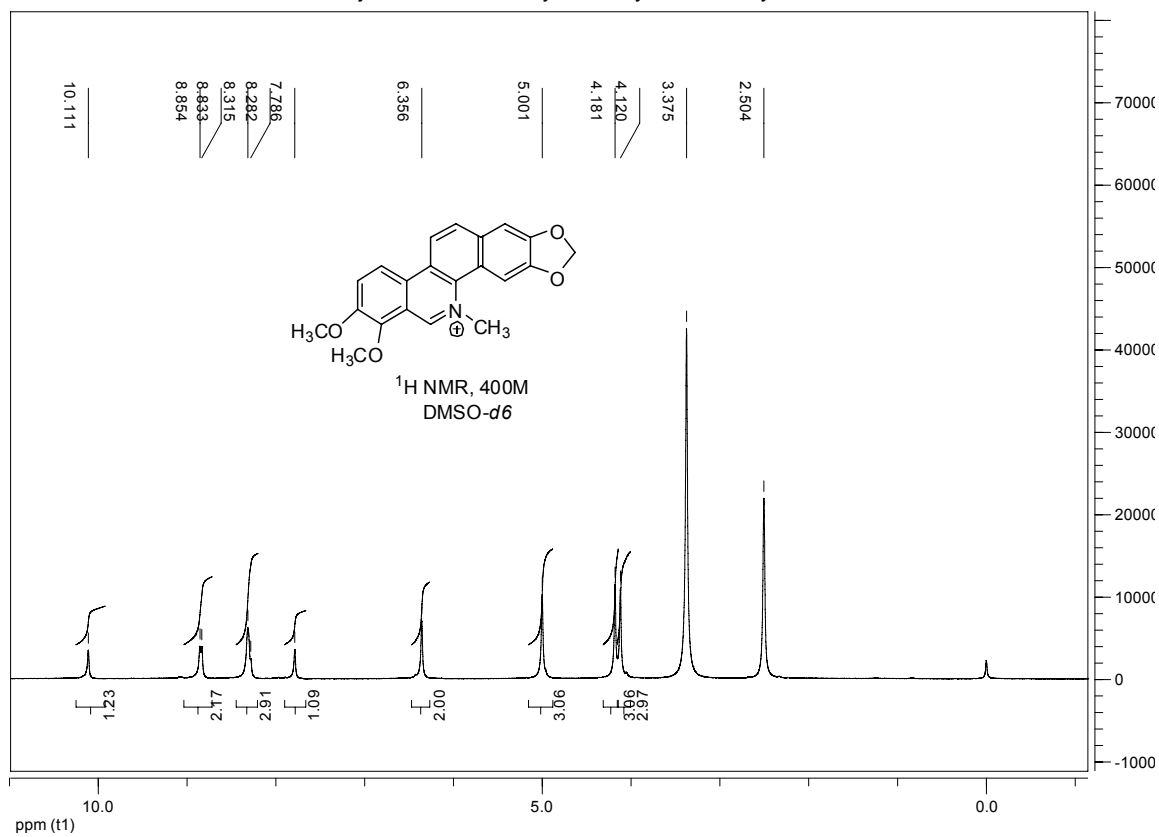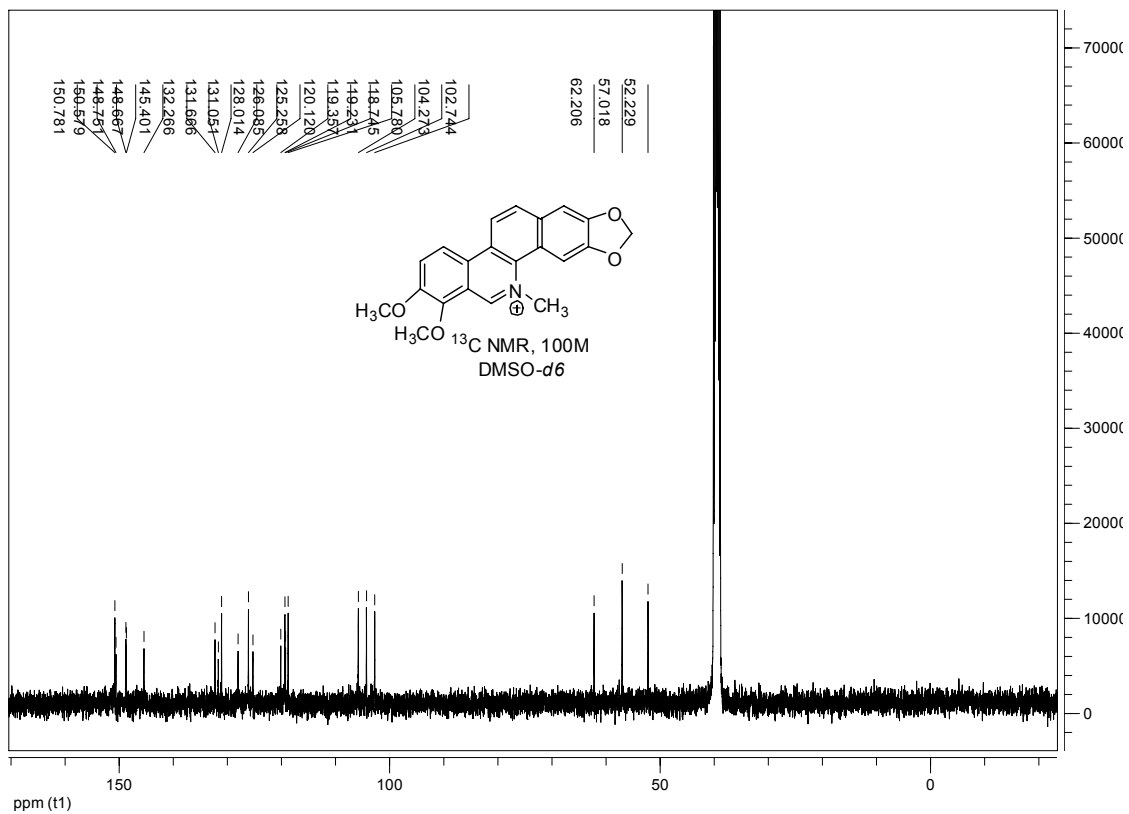

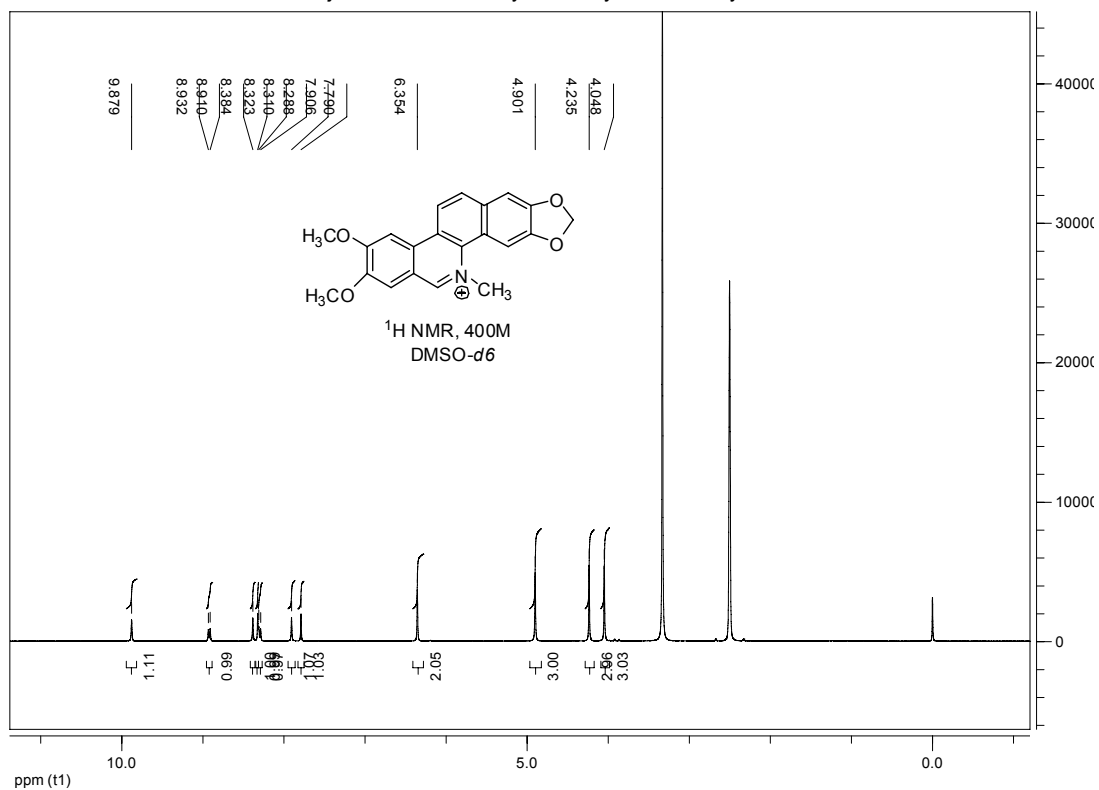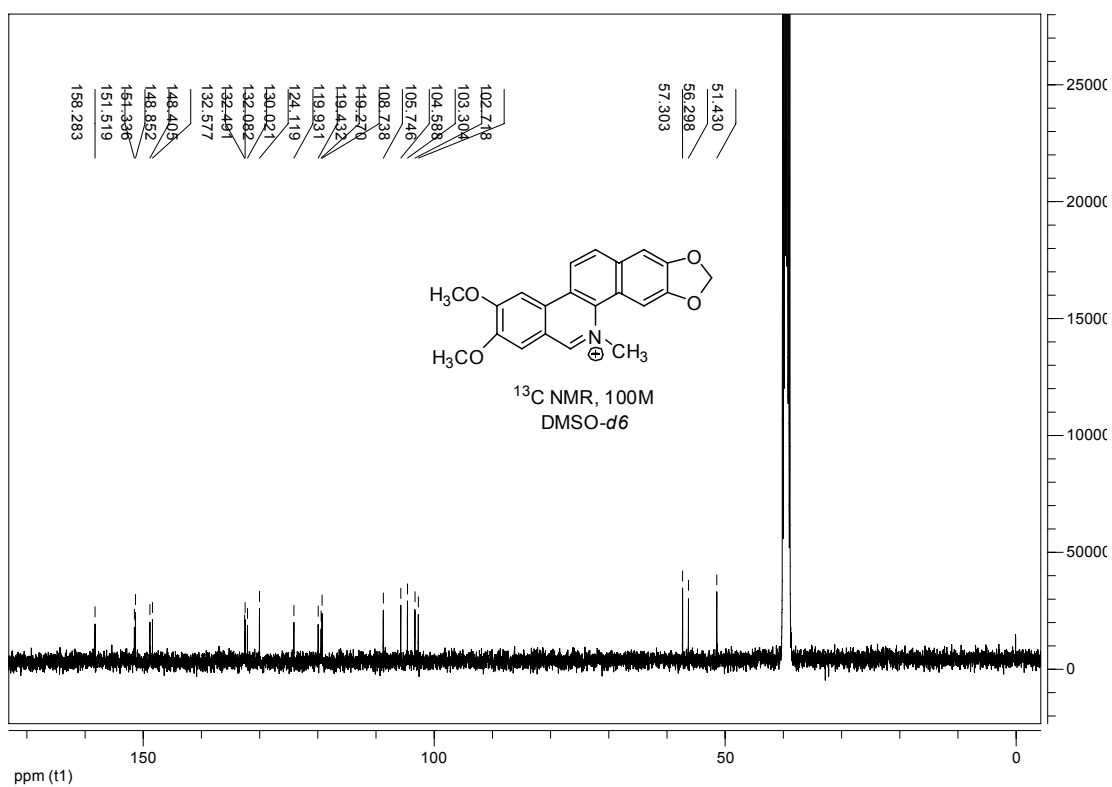

Avicine Chloride
